# Supplementary material for: Identification and validation of ferroptosis-related lncRNA signatures as a novel prognostic model for glioma
Source: Front Genet. 2022 Sep 20;13:927142. doi: 10.3389/fgene.2022.927142 (PMC9549413; doi:10.3389/fgene.2022.927142)
Supplement: Supplementary file 1 [file Table2.XLSX]

## Sheet: Sheet1
gene	conMean	treatMean	logFC	pValue	fdr
AC090241.2	0.808531	0.169726	-2.2521	4.05869e-184	2.05444e-183
AC015468.3	0.748511	0.117038	-2.67704	2.51622e-103	6.34099e-103
AL080312.2	1.13993	0.278876	-2.03125	7.64674e-163	3.23951e-162
LINC01181	0.0294408	0.128878	2.13012	1.40804e-107	3.68962e-107
ALG1L9P	0.117829	0.606661	2.3642	2.10203e-244	2.17015e-243
AP001626.1	0.142198	0.686701	2.27179	1.25894e-215	9.17619e-215
AC116612.1	0.00793382	0.161313	4.34571	8.03444e-116	2.27191e-115
AC092675.2	0.00959161	0.233712	4.60681	2.01523e-117	5.79862e-117
AC116914.1	0.0167933	0.0825762	2.29784	7.59905e-66	1.42338e-65
FP236315.1	0.276076	0.0192846	-3.83954	2.64079e-144	9.4337e-144
AC012414.4	0.0140535	0.0892275	2.66656	6.91475e-107	1.79988e-106
AL031710.1	2.25943	0.489984	-2.20515	4.13777e-220	3.22188e-219
AC099792.1	0.358181	1.45348	2.02075	6.85789e-204	4.32287e-203
AC108063.1	0.0357046	0.278921	2.96568	2.06256e-189	1.09521e-188
AL162724.2	0.162953	0.863	2.4049	5.444e-205	3.46889e-204
AP000439.2	0.002299	0.880026	8.58039	0	0
AL158166.1	0.0389112	0.746689	4.26225	6.28798e-296	3.20824e-294
AP001468.1	0.0148826	0.0996997	2.74396	9.08243e-157	3.62525e-156
AC020703.1	0.00698988	0.0464401	2.73203	3.66731e-78	7.59234e-78
AP001610.2	0.000563263	0.0747375	7.05188	7.39125e-190	3.94555e-189
LINC01776	0.0276406	0.112931	2.03058	2.97817e-39	4.48829e-39
SNCA-AS1	0.0923683	0.0211278	-2.12825	1.92374e-94	4.51351e-94
AC092803.1	0.0366891	1.28397	5.12912	0	0
AC244502.3	0.0128422	0.231845	4.17419	1.05681e-114	2.95748e-114
AL365440.1	0.0297917	0.000291978	-6.67291	1.10035e-111	2.98443e-111
AC004233.3	1.53972	0.328985	-2.22658	1.52298e-256	1.92174e-255
AC098851.1	0.0705606	0.51418	2.86534	1.28087e-206	8.38938e-206
AL022316.1	0.00867574	0.157524	4.18244	1.73868e-203	1.09401e-202
AC083843.2	0.058372	0.486867	3.06018	1.38443e-270	2.3209e-269
LINC02281	0.00600205	0.104492	4.12179	2.74711e-118	7.95329e-118
AL391261.1	0.00146824	0.572288	8.60651	0	0
AC005674.1	0.106069	0.846989	2.99734	1.81684e-272	3.26336e-271
AC087627.1	0.0439964	0.194604	2.14509	8.06856e-40	1.22147e-39
AC011290.1	0.00814906	0.457504	5.81101	0	0
AC087276.1	0.0321789	0.865645	4.74959	2.67783e-297	1.4964e-295
AC068643.1	0.28827	1.33323	2.20943	3.0878e-169	1.38655e-168
AC093248.1	0.00944912	0.15063	3.99469	1.01293e-161	4.24274e-161
AC103808.2	0.00322116	0.0856197	4.73229	1.12826e-118	3.27996e-118
AC112236.1	0.0222441	0.151858	2.77122	1.54868e-91	3.55187e-91
LINC01397	0.0892956	0.481016	2.42942	6.11539e-192	3.36131e-191
LINC00964	0.212696	0.0517337	-2.03962	2.22582e-89	5.04733e-89
AL445644.1	0.000689738	0.0827461	6.9065	3.20077e-156	1.2711e-155
FP236383.3	9.22851	0.0379769	-7.92483	0	0
AC010536.3	0.204331	0.887291	2.1185	1.63246e-178	7.85656e-178
AC026780.2	0.0361593	0.318347	3.13816	5.04331e-162	2.11873e-161
LINC01856	0.0753592	0.0120842	-2.64067	3.0757e-59	5.45217e-59
CDKN2A-DT	0.0169029	0.0985161	2.54309	5.26805e-61	9.49382e-61
AC026367.1	0.161845	0.676835	2.06419	3.07494e-204	1.94875e-203
AC079336.2	0.0729507	0.0103344	-2.81946	9.32137e-67	1.75533e-66
AC097375.3	0.0474741	0.00684459	-2.7941	1.90427e-27	2.58592e-27
SMAD9-IT1	0.108741	0.625809	2.52483	5.44271e-179	2.63201e-178
AC092384.2	0.596135	0.0525316	-3.50438	5.65636e-241	5.51612e-240
AC244517.11	0.266197	0.0349266	-2.93009	1.71852e-36	2.52401e-36
AC020612.2	7.00096e-05	0.157208	11.1328	3.90302e-281	1.07769e-279
AL391422.2	0.0106388	0.0617545	2.53721	2.36251e-117	6.78956e-117
AC004596.1	0.0361811	0.291047	3.00794	7.5346e-221	5.91429e-220
PEX5L-AS1	0.0548156	0.0135096	-2.0206	9.79764e-16	1.19063e-15
AC005632.3	0.018165	0.752138	5.37176	0	0
AC090970.1	0.00857344	0.069281	3.01451	5.71157e-88	1.27748e-87
LINC02293	0.0646423	0.978623	3.9202	8.71394e-227	7.22672e-226
AC026362.1	1.08145	0.15137	-2.83681	3.57735e-276	7.2798e-275
AC012368.2	0.0306566	0.132514	2.11187	1.52203e-131	4.93172e-131
AC093802.1	0.0406553	0.181215	2.15619	1.71424e-41	2.63134e-41
AC015936.1	0.0883512	0.684874	2.95452	1.79069e-125	5.489e-125
AC008050.1	0.0880435	0.424581	2.26975	6.30181e-187	3.26738e-186
AL121832.1	0.296988	0.00726995	-5.35232	1.04484e-95	2.47534e-95
AC097717.1	0.12292	0.00677497	-4.18136	3.58333e-31	5.02895e-31
LINC01346	0.360778	0.0562724	-2.68061	1.52602e-36	2.24363e-36
AL136084.1	0.000629404	0.00351529	2.48158	3.35115e-138	1.13988e-137
AC003956.1	0.0844359	0.460574	2.4475	5.41352e-189	2.86375e-188
AL355574.1	0.16811	2.37779	3.82214	8.15571e-295	3.9603e-293
AC019118.1	0.00673336	0.0553247	3.03852	4.36633e-102	1.09058e-101
AC023644.1	0.0221381	0.356772	4.0104	6.8328e-262	9.47042e-261
AC100782.1	0.00561621	0.0890411	3.9868	1.53799e-154	6.01276e-154
EZR-AS1	0.00843501	0.340597	5.33553	8.03184e-235	7.26891e-234
AC104002.3	1.14068	0.000443865	-11.3275	7.67596e-218	5.78655e-217
LINC01001	2.65041	0.220473	-3.58754	1.75279e-279	4.25566e-278
AC096669.1	0.0123085	0.159349	3.69446	1.12366e-177	5.36751e-177
AC127164.1	0.237088	0.0180791	-3.71303	1.38863e-208	9.22388e-208
CU634019.5	9.56448e-05	0.113008	10.2065	0	0
AC087667.1	0.00364686	0.0421499	3.53081	3.05084e-87	6.78919e-87
AC087203.3	1.82273	0.321812	-2.50181	7.78904e-268	1.23798e-266
BX664730.1	0.161893	0.0166274	-3.28341	1.67586e-58	2.94994e-58
AL162427.1	0.00813932	0.0685321	3.0738	2.53551e-113	6.99824e-113
AC104794.4	1.30337	0.00107253	-10.247	1.9455e-279	4.64347e-278
AC009097.2	0.0890798	0.446677	2.32606	1.06926e-98	2.58895e-98
AC016877.3	0.0117969	0.169436	3.84426	8.38142e-125	2.55139e-124
PHACTR2-AS1	0.0550377	0.00639259	-3.10595	1.72006e-102	4.31148e-102
AC078777.1	0.00584679	0.0837487	3.84035	1.74197e-253	2.07183e-252
AL157911.1	0.00974144	0.0991103	3.34683	3.85496e-188	2.01058e-187
AP002833.1	0.169933	0.0413807	-2.03794	5.97057e-65	1.11067e-64
AC005586.1	0.342066	0.0464374	-2.88091	1.23147e-137	4.17066e-137
AL590867.1	0.0329057	0.00130568	-4.65546	1.40764e-72	2.78875e-72
LINC01908	0.0155605	0.107126	2.78335	4.90967e-114	1.3669e-113
MIR4527HG	0.027615	0.137056	2.31124	1.66008e-174	7.71527e-174
AP005131.4	0.0819721	0.0178647	-2.19802	4.15027e-34	5.97833e-34
SFTPD-AS1	0.171499	0.028796	-2.57426	2.64826e-188	1.38224e-187
LINC00470	0.0526321	0.00802484	-2.7134	7.00082e-18	8.70073e-18
AL031599.1	0.000427424	0.0291871	6.09352	2.7878e-111	7.54378e-111
AC092718.5	0.365282	0.0835283	-2.12867	6.97856e-157	2.79024e-156
AL359397.1	0.0646212	0.365258	2.49884	4.10191e-192	2.2599e-191
AL021707.4	0.158453	0.668252	2.07634	4.91486e-205	3.1431e-204
AC138393.2	0.00188008	0.221653	6.88136	4.22075e-293	1.95515e-291
MEG8	2.00914	0.328309	-2.61345	7.45244e-257	9.43752e-256
AC006063.1	0.027526	0.13385	2.28176	1.86017e-120	5.49161e-120
AC068987.3	0.0267436	0.578537	4.43514	2.35644e-288	9.48098e-287
MID1IP1-AS1	0.343421	2.13075	2.63331	6.64988e-255	8.12878e-254
LINC02052	0.00303342	0.0450095	3.89121	2.01171e-202	1.25017e-201
CLMAT3	0.0289958	0.135688	2.22638	7.05257e-146	2.55701e-145
LINC02051	0.0277602	0.724649	4.7062	1.74971e-252	2.04647e-251
AC010913.1	1.51518	0.222612	-2.76688	4.43571e-264	6.47964e-263
AP003774.1	0.830185	0.00142581	-9.18551	2.38829e-297	1.34527e-295
AC092819.1	0.00308655	0.0129189	2.06541	5.3803e-99	1.3081e-98
AL162430.2	0.0155401	0.070152	2.17449	1.72068e-110	4.62241e-110
AC024145.1	0.0829594	0.589562	2.82917	9.45923e-245	9.86703e-244
AC100849.1	0.0127848	0.0522679	2.0315	9.68684e-99	2.34947e-98
AC093627.7	0.186957	1.03547	2.4695	1.42794e-207	9.43163e-207
AC104532.2	0.16051	0.852713	2.40939	1.19228e-249	1.34103e-248
RBAKDN	0.640729	0.089693	-2.83665	1.4286e-148	5.32212e-148
TLX1NB	0.00167623	0.39838	7.89278	2.34272e-173	1.07811e-172
AC114939.1	0.0583969	0.335636	2.52293	1.96486e-203	1.23523e-202
BX640514.2	0.0381643	0.294141	2.94621	2.09492e-55	3.59151e-55
LINC02343	0.0361855	0.23224	2.68213	1.38891e-110	3.73684e-110
AC022509.2	0.0665066	1.34246	4.33524	1.02178e-289	4.25701e-288
AC103726.2	0.0249707	0.551003	4.46375	1.17338e-271	2.01999e-270
AC007952.7	0.318124	0.00119646	-8.05468	1.41017e-264	2.08155e-263
AC084116.1	0.00341248	0.198252	5.86037	9.83654e-162	4.12256e-161
AL354950.1	0.613125	0.10965	-2.48327	1.41978e-209	9.51156e-209
AC091151.1	0.00364054	0.452361	6.95718	2.86945e-250	3.26922e-249
ARMC2-AS1	7.00096e-05	0.350398	12.2892	2.57396e-166	1.13058e-165
AC240565.1	0.562387	0.0221	-4.66945	4.45865e-218	3.3829e-217
LINC00858	0.0310725	0.00575468	-2.43283	3.12816e-30	4.36147e-30
AC073333.1	0.0131172	0.15374	3.55096	4.60497e-205	2.9476e-204
AC005486.1	0.108114	0.530026	2.29351	2.62199e-185	1.34265e-184
AC127540.1	0.0131105	0.060369	2.20308	4.88121e-114	1.35952e-113
AC012447.1	0.168002	0.975173	2.53718	3.78068e-259	4.98497e-258
AP001453.1	0.841216	0.18459	-2.18815	1.06583e-241	1.05105e-240
AC007552.2	0.0248318	0.172393	2.79544	1.62908e-103	4.11271e-103
AC004921.1	0.0817214	0.44103	2.43209	4.14164e-147	1.51803e-146
AC022498.1	0.00699046	0.245302	5.13303	1.36322e-193	7.61778e-193
CXXC4-AS1	0.0772562	0.0140139	-2.46279	1.06181e-122	3.18678e-122
AC078850.1	0.0243798	0.105072	2.10761	1.65632e-75	3.36085e-75
LINC00824	0.0738886	0.00923819	-2.99967	1.94334e-39	2.93376e-39
LINC00644	0.0309864	0.229615	2.88951	2.4462e-119	7.16758e-119
AL136309.3	0.00140903	0.0248049	4.13785	1.72767e-123	5.20074e-123
AL353807.2	0.0250567	0.413763	4.04554	3.657e-248	4.01074e-247
AC007009.1	1.58649	0.000383121	-12.0158	4.56606e-297	2.51169e-295
AL033397.2	0.151519	0.64273	2.08471	1.12106e-169	5.04693e-169
AL591623.1	0.0412962	0.00632819	-2.70615	2.06012e-55	3.53271e-55
AC116345.3	0.0185441	0.318456	4.10206	8.36053e-201	5.05726e-200
AC145350.2	0.0994251	0.0019986	-5.63655	9.21648e-100	2.25246e-99
LINC02381	0.773785	3.14037	2.02093	8.8162e-220	6.80645e-219
AL354928.1	0.0282898	0.262903	3.21618	2.65951e-227	2.22659e-226
AL591848.3	0.185458	1.26216	2.76673	3.6002e-280	9.42341e-279
AC093525.4	1.03435	0.102302	-3.33783	3.86504e-270	6.3882e-269
AC105389.2	0.0478236	0.464154	3.27881	3.72554e-228	3.16042e-227
LINC00319	0.0808466	0.00261009	-4.95302	2.88071e-111	7.78919e-111
AP005202.1	0.0163825	0.178331	3.44433	6.82794e-101	1.69101e-100
LINC01749	0.0818161	0.00500381	-4.03129	4.90889e-23	6.39828e-23
AP001628.1	0.00653376	0.362881	5.79544	1.83577e-274	3.52197e-273
AL590729.1	0.0264125	0.117597	2.15455	3.10386e-121	9.21345e-121
AL360181.1	0.0626032	0.302892	2.27449	1.00209e-128	3.16258e-128
AC092159.2	0.0935505	0.00636219	-3.87815	1.12933e-201	6.94463e-201
AC093802.2	0.0287297	0.182735	2.66914	4.2615e-114	1.18786e-113
AC092295.1	0.0237719	0.122158	2.36143	2.72411e-121	8.09301e-121
AL356056.1	0.473128	0.0077532	-5.9313	3.88868e-251	4.47389e-250
LIN28B-AS1	0.430935	0.0621157	-2.79444	1.00389e-130	3.22756e-130
AC068987.2	1.70772	0.0398197	-5.42244	3.5424e-192	1.95317e-191
TFAP2A-AS1	0.14624	1.26778	3.11589	1.04989e-212	7.3482e-212
AC005480.1	0.181766	0.0297426	-2.61148	2.55186e-100	6.27801e-100
RMRP	1.55913	0.0432687	-5.17128	6.82909e-278	1.49328e-276
AC100786.1	1.34073	0.110327	-3.60316	3.30489e-277	6.98791e-276
NCBP2-AS1	0.0931768	0.475464	2.35129	9.85469e-198	5.75347e-197
AC015802.4	0.955825	0.1568	-2.60783	1.39036e-242	1.39452e-241
AC129492.4	0.000747367	0.25385	8.40795	0	0
LINC01783	0.441857	0.044454	-3.31319	8.06032e-190	4.29945e-189
AC087521.3	0.016245	0.356739	4.4568	0	0
MRGPRF-AS1	0.228913	0.0357328	-2.67948	9.91982e-32	1.39915e-31
LINC02623	0.00846546	0.0413626	2.28867	3.68359e-29	5.07557e-29
AC011337.1	0.767685	0.153041	-2.32659	1.64388e-135	5.4752e-135
AP000919.3	0.00544026	0.113205	4.37912	1.74193e-222	1.39058e-221
AC131011.1	0.0539365	0.226635	2.07103	2.40923e-141	8.44369e-141
AC025043.1	0.0119352	0.243112	4.34833	8.7345e-278	1.88649e-276
AL157871.6	1.34708	0.197542	-2.76961	5.31835e-138	1.80465e-137
AC104129.1	0.135541	0.0265867	-2.34995	2.96859e-154	1.15928e-153
LINC00602	0.0789836	0.0055365	-3.83451	4.77721e-109	1.26834e-108
AC046168.2	0.26319	1.16066	2.14077	2.07665e-196	1.19069e-195
AIRN	0.0775772	0.0112344	-2.7877	1.07634e-136	3.62088e-136
AP001893.1	0.0780835	0.340442	2.12432	9.34873e-141	3.25059e-140
AL049830.3	0.447112	0.0200841	-4.47651	2.93186e-73	5.84463e-73
AL049543.1	0.081922	0.0173294	-2.24103	6.37807e-74	1.27943e-73
CASC17	0.00313534	0.124389	5.3101	6.85065e-271	1.1623e-269
AC007952.3	0.0755428	0.00252416	-4.90342	5.28421e-115	1.48232e-114
AC010768.2	0.00586376	0.069043	3.5576	4.77189e-140	1.64943e-139
AC245100.5	0.0107785	1.05213	6.60902	0	0
PIK3CD-AS2	0.132924	0.697783	2.39218	9.52965e-86	2.0942e-85
AC018552.2	0.00217007	0.0415101	4.25765	5.79456e-152	2.22099e-151
AC005884.2	0.0296915	0.186149	2.64834	1.57467e-105	4.05828e-105
AC093620.1	0.350339	1.85039	2.40101	6.66442e-264	9.67509e-263
LINC00028	0.0217516	0.0934631	2.10328	1.82864e-61	3.30563e-61
AC112493.1	0.0639708	0.501871	2.97183	1.89112e-87	4.21372e-87
AC090618.1	0.0498648	0.344449	2.7882	1.29825e-176	6.13487e-176
AL117190.1	1.81001	0.268366	-2.75372	2.67835e-258	3.47297e-257
AL590399.3	0.418351	0.00862123	-5.60068	8.11357e-229	6.91618e-228
AC011330.2	1.83779	0.32921	-2.4809	8.42266e-278	1.82474e-276
AC012613.2	0.0624659	0.00277615	-4.49191	3.67645e-107	9.59803e-107
IQCA1-AS1	0.0536695	0.789159	3.87814	1.14773e-235	1.05087e-234
SNAP47-AS1	0.0343528	0.00713261	-2.26792	9.61507e-29	1.31994e-28
AC079296.1	0.729279	0.0929822	-2.97145	4.34335e-162	1.82576e-161
FAM138B	0.205181	0.0292231	-2.81172	7.35043e-98	1.76757e-97
AC023983.1	0.0224393	0.205776	3.19698	2.00921e-177	9.56513e-177
AC024940.5	7.00096e-05	0.0855175	10.2545	2.0778e-184	1.05478e-183
LINC02521	0.00646337	0.0806825	3.6419	4.31875e-101	1.07034e-100
KCNIP4-IT1	0.0863438	0.00243269	-5.14947	2.17072e-177	1.0327e-176
AC113346.2	0.0087062	0.113695	3.70698	2.10415e-100	5.182e-100
AC092384.3	0.425749	0.0599917	-2.82717	3.07174e-173	1.41268e-172
LINC02346	0.453927	0.0586533	-2.95218	4.80151e-98	1.1566e-97
AC073352.1	0.312687	0.0157457	-4.31169	1.64906e-215	1.19825e-214
AL136140.1	0.00239405	0.0899036	5.23085	3.76923e-143	1.33698e-142
AC108463.2	0.0399975	0.429736	3.42547	6.35087e-156	2.5164e-155
CNTN4-AS1	0.105691	0.0063045	-4.06732	1.08287e-81	2.30487e-81
AC118754.1	4.05769	0.301329	-3.75125	2.63517e-280	6.97528e-279
AL589765.4	0.300908	1.48289	2.30101	1.06365e-268	1.70985e-267
AL049649.1	0.00221675	0.0717048	5.01555	2.9334e-240	2.82932e-239
AC073525.1	0.735866	0.111627	-2.72076	7.76077e-60	1.38513e-59
AL161734.1	0.89888	0.177627	-2.33928	3.76434e-139	1.29228e-138
LINC00426	0.443395	0.073785	-2.58719	2.51722e-165	1.09541e-164
AC007390.1	0.00990396	0.361291	5.18901	0	0
AC104794.2	1.45892	0.0646256	-4.49665	8.37196e-285	2.93269e-283
AC055720.2	0.0699152	3.2607	5.54343	0	0
AL021154.1	0.0630085	0.347963	2.46531	8.15432e-174	3.76983e-173
AC002401.1	0.00618928	0.110079	4.15262	5.05076e-205	3.22708e-204
AC013565.2	7.00096e-05	0.171001	11.2542	2.95544e-307	3.06018e-305
AL359710.1	0.0854635	0.347706	2.02449	6.78979e-201	4.11419e-200
MNX1-AS1	0.00516705	0.374273	6.17861	3.69862e-176	1.74194e-175
AC007495.1	0.523149	0.0315865	-4.04984	4.22791e-274	8.02391e-273
AC022778.1	0.0167775	0.116851	2.80008	7.41945e-96	1.75953e-95
Z82196.1	0.0497251	0.201519	2.01887	5.22506e-43	8.13031e-43
AC064836.2	0.20062	2.40038	3.58073	8.51308e-287	3.29344e-285
AP000911.1	1.91342	0.10775	-4.1504	3.477e-280	9.1349e-279
LINC01587	0.0302449	0.203343	2.74915	1.97163e-88	4.42814e-88
AC020907.2	1.85857	0.33353	-2.4783	1.2237e-88	2.75449e-88
Z95331.1	0.0795621	0.0120224	-2.72636	6.65091e-256	8.28833e-255
AC145207.8	0.0907236	0.453224	2.32067	4.76459e-194	2.67737e-193
AC012354.1	0.308881	0.0505208	-2.6121	3.01241e-43	4.69672e-43
AC021087.4	0.506199	0.104968	-2.26975	5.66013e-111	1.52635e-110
AC018521.6	0.218521	0.878094	2.0066	1.10248e-213	7.84892e-213
AC019294.2	0.325378	0.0583188	-2.48008	2.2323e-190	1.19982e-189
AC013724.1	0.0190571	0.370908	4.28266	1.14781e-213	8.16336e-213
HOXC-AS2	0.00523707	0.185714	5.14818	2.05894e-75	4.1718e-75
AL355073.1	0.0153022	0.157763	3.36595	3.72473e-165	1.61788e-164
LINC02097	0.0481921	0.233154	2.27441	5.84405e-192	3.21469e-191
AC010223.1	0.03452	0.149936	2.11884	2.26933e-93	5.27512e-93
FP325318.1	0.040562	0.00380449	-3.41435	1.29796e-73	2.59555e-73
LINC02208	0.041738	0.00853727	-2.28951	3.16641e-57	5.50351e-57
AP001330.4	7.00096e-05	1.38493	14.2719	0	0
AGAP11	0.582821	0.00955784	-5.93022	1.58315e-273	2.98046e-272
AL157932.1	0.0573713	0.742569	3.69412	1.08749e-279	2.72491e-278
AL137847.1	0.0539833	0.454175	3.07266	1.39572e-191	7.63579e-191
MIR583HG	0.00375574	0.0551121	3.8752	1.63677e-155	6.47445e-155
AL158071.2	0.0648031	0.444501	2.77805	1.02826e-225	8.42837e-225
SNHG22	2.08905	0.364501	-2.51885	1.92603e-275	3.80931e-274
AL160270.1	0.0411173	0.42592	3.37276	7.2212e-192	3.96293e-191
AC126365.1	0.00909485	0.109813	3.59386	4.72188e-215	3.40993e-214
LAMC1-AS1	0.0419922	0.311538	2.89121	4.3771e-176	2.05735e-175
AL603832.1	0.02372	0.177958	2.90736	8.12633e-161	3.37168e-160
AC244453.3	0.0463833	0.373437	3.00919	4.03111e-201	2.46167e-200
AC068631.1	0.13255	0.00865673	-3.93657	1.45982e-14	1.74984e-14
AC063977.5	0.000973737	0.0450201	5.53089	1.05359e-243	1.07201e-242
AC010761.6	0.013709	0.134312	3.2924	9.86865e-114	2.73671e-113
AC127496.3	0.0127036	0.0912044	2.84386	1.51201e-130	4.84573e-130
AL020994.2	1.62622	0.17883	-3.18486	6.45485e-99	1.56719e-98
AL121820.1	0.119027	0.900676	2.91972	2.30054e-252	2.68625e-251
AC092127.2	0.108655	0.845605	2.96023	1.18875e-193	6.65342e-193
LINC01725	0.0695243	0.00894609	-2.95819	2.23555e-33	3.19799e-33
AC109809.1	0.250541	0.0492435	-2.34704	3.7853e-93	8.79033e-93
AC004448.3	0.465957	0.102726	-2.1814	3.66654e-57	6.36492e-57
AC051618.1	0.0101326	0.362555	5.16111	9.03476e-168	4.01855e-167
AC119424.1	0.120733	0.79143	2.71264	2.43802e-200	1.46219e-199
AC005229.3	0.000754836	1.98916	11.3637	0	0
AP001372.1	0.0173021	0.17564	3.3436	3.39221e-242	3.37353e-241
AC109446.2	0.00282922	0.0506345	4.16164	1.40123e-152	5.38835e-152
AC005391.1	0.013315	0.0823594	2.62889	7.42502e-116	2.10211e-115
AL445645.1	0.0777673	0.43515	2.48428	5.3379e-194	2.99714e-193
AC013726.1	0.190425	0.0278563	-2.77315	9.6997e-148	3.58319e-147
LINC01436	0.053479	0.23255	2.12049	1.41608e-12	1.66733e-12
AC090617.2	0.0118549	0.0538614	2.18377	1.92043e-79	4.01359e-79
AC003035.2	0.0581985	0.272944	2.22955	1.17136e-55	2.01208e-55
AC245008.1	0.266621	0.0613162	-2.12045	8.79776e-75	1.7729e-74
AC159540.2	3.56005	0.0110581	-8.33065	4.55526e-282	1.35905e-280
AP000873.3	0.0518311	0.499692	3.26915	3.86949e-273	7.15093e-272
AC140125.2	0.971288	0.15104	-2.68497	3.2984e-189	1.74748e-188
AL133346.1	0.120147	0.578647	2.26788	2.7676e-157	1.10783e-156
LINC00867	0.197809	0.0286283	-2.78859	5.38636e-59	9.5266e-59
AC006262.2	0.0183845	0.174529	3.24691	9.17481e-171	4.16504e-170
AC103810.2	1.00732	0.193671	-2.37884	2.55043e-218	1.94136e-217
AL162725.2	0.023337	0.129566	2.473	5.15053e-95	1.2145e-94
AC138430.1	0.847318	0.170469	-2.31339	6.81205e-160	2.79671e-159
Z84468.1	0.230971	0.0275756	-3.06625	3.34757e-82	7.16202e-82
NLGN4Y-AS1	0.0622978	0.269001	2.11036	1.78856e-43	2.79726e-43
AC016866.1	0.0315781	0.36938	3.54811	5.16953e-245	5.41647e-244
AL133227.1	0.0168369	0.323011	4.26188	1.98776e-269	3.25485e-268
AC007663.2	0.111529	0.010147	-3.45829	2.45037e-58	4.30251e-58
LINC00570	0.335269	0.0252589	-3.73045	2.70107e-70	5.22623e-70
AC146944.2	0.687222	0.116496	-2.5605	4.5265e-197	2.62314e-196
AL445307.1	0.265898	1.30729	2.29763	5.7411e-232	5.01527e-231
AC138207.5	0.222972	2.27082	3.34828	6.86405e-282	2.00539e-280
AC244517.7	0.287324	2.3906	3.05662	1.42636e-272	2.58175e-271
AC073569.2	0.00842358	0.198763	4.56047	4.05922e-200	2.42417e-199
AC079354.1	0.0308689	0.130787	2.08299	1.11803e-162	4.73081e-162
LINC00578	0.106764	0.491428	2.20256	5.24362e-119	1.53006e-118
LINC02279	0.0388823	0.174431	2.16547	7.83031e-116	2.21508e-115
AC079305.2	0.000539363	0.322094	9.22201	9.76738e-251	1.12007e-249
LINC01801	0.0239881	0.143062	2.57625	2.51944e-87	5.61018e-87
AL354740.1	5.0575	0.136604	-5.21035	9.71926e-280	2.47052e-278
AC114956.1	0.0650541	0.653042	3.32746	2.29021e-265	3.47529e-264
AP005131.2	0.0586115	0.248428	2.08357	4.50328e-128	1.41488e-127
LINC00519	0.107139	1.07191	3.32262	3.72031e-232	3.2621e-231
AC016027.2	0.0809372	0.0174424	-2.21421	1.68754e-105	4.34759e-105
FAM230B	0.0730496	0.000772786	-6.56266	6.86356e-89	1.54892e-88
AL133260.1	0.614536	0.0147629	-5.37945	1.85642e-226	1.53057e-225
AC126755.1	3.9033	0.00394533	-9.95033	1.03671e-295	5.2514e-294
AC005307.1	0.060548	0.00350365	-4.11115	4.33592e-59	7.67645e-59
AC005324.4	1.01895	0.213334	-2.25589	1.06715e-176	5.04621e-176
AL157395.1	0.165887	0.789928	2.25152	1.39438e-217	1.04668e-216
LINC01670	0.238002	0.0118398	-4.32926	4.13119e-130	1.31917e-129
AC135178.2	0.245806	0.0552032	-2.1547	2.64794e-190	1.41997e-189
PCA3	0.0755767	0.0173707	-2.12128	1.9896e-67	3.76276e-67
AC114296.1	0.130927	0.67543	2.36704	4.69272e-135	1.55635e-134
AC010894.2	1.35524	0.062741	-4.43299	1.53005e-266	2.36252e-265
AP001363.1	0.00324318	0.0908598	4.80816	8.93265e-107	2.3217e-106
AC091564.5	0.00991636	0.0837699	3.07855	1.59711e-136	5.36255e-136
AP000864.1	0.393222	0.0393346	-3.32147	1.40545e-27	1.90965e-27
AC091100.1	0.134642	0.016847	-2.99857	9.00213e-82	1.91782e-81
AL603839.2	0.155649	0.887106	2.51081	2.30351e-218	1.7553e-217
AC006213.4	0.180023	1.93728	3.42778	3.94769e-286	1.49439e-284
AC008737.1	0.17331	0.815081	2.23359	1.47963e-176	6.98733e-176
AC104794.3	0.00315729	1.28791	8.67212	0	0
ZNF451-AS1	1.07106	0.181711	-2.55933	3.50581e-274	6.67146e-273
LINC02389	0.836738	0.180435	-2.2133	1.01502e-192	5.63179e-192
AC244517.6	0.0968039	0.414548	2.0984	1.20507e-119	3.53979e-119
AC037450.1	0.00894996	0.489214	5.77244	6.24039e-302	6.01898e-300
AC110995.1	0.161669	1.11787	2.78964	2.29049e-251	2.64817e-250
AL162724.1	0.0200987	0.0834121	2.05316	2.70312e-74	5.43481e-74
AC010519.1	0.00297561	0.120371	5.33816	3.45872e-160	1.42331e-159
AL354893.2	0.224876	0.0430648	-2.38455	7.85008e-20	9.9572e-20
LINC01389	0.0463872	0.46144	3.31434	1.03084e-254	1.25356e-253
AP000894.2	0.520765	0.127494	-2.0302	7.77963e-119	2.26442e-118
CASK-AS1	0.0198774	0.131536	2.72625	4.41722e-150	1.66319e-149
AC023509.1	1.03186	0.0218584	-5.56091	3.45561e-268	5.50474e-267
AC007557.3	0.0258358	0.00253378	-3.35001	2.04092e-24	2.69356e-24
AF064860.1	0.0296564	0.256192	3.11081	2.15385e-161	8.99483e-161
AL670729.2	0.00179126	0.189991	6.72881	1.73099e-292	7.763e-291
LINC01150	0.138683	1.3548	3.28822	3.53404e-250	4.01342e-249
AC087289.2	0.188331	0.841156	2.1591	6.98636e-262	9.66424e-261
AC087289.5	0.0041178	0.648097	7.29819	0	0
AC079466.1	0.0392127	0.00508242	-2.94774	7.48479e-58	1.30868e-57
AC024592.2	0.0199681	0.0951009	2.25177	3.4015e-80	7.14925e-80
AP002840.1	0.0242064	0.117195	2.27545	4.45751e-87	9.90387e-87
AC136624.2	0.622935	0.000814884	-9.57827	3.08729e-285	1.10906e-283
AC017076.1	1.46178	0.253516	-2.52758	5.04987e-204	3.19176e-203
SMIM15-AS1	0.0604947	0.258813	2.09703	1.02028e-170	4.62577e-170
AC114956.2	0.155341	0.732283	2.23697	2.74275e-259	3.63686e-258
AL392183.1	0.0415839	0.00952029	-2.12695	1.18826e-44	1.87506e-44
LINC01111	0.00890164	0.0457907	2.36291	1.10082e-42	1.70761e-42
FIRRE	0.0980072	0.629619	2.68352	1.18368e-168	5.28301e-168
AC074131.1	0.0641377	0.617152	3.26638	5.71991e-235	5.19663e-234
AC005912.2	0.032771	0.00360476	-3.18444	7.1728e-23	9.33007e-23
MIR1-1HG	0.0718567	0.00720412	-3.31823	1.94064e-58	3.41346e-58
AC148477.2	0.864758	0.039726	-4.44414	2.60047e-89	5.89121e-89
AC020934.2	0.0177284	0.157707	3.15311	1.7782e-190	9.5794e-190
AJ239328.1	0.210065	0.0504847	-2.05692	1.03506e-113	2.86923e-113
AC009171.2	0.0381612	0.159587	2.06416	1.24346e-89	2.82516e-89
LINC01396	0.0028496	0.0724031	4.66722	1.98398e-163	8.45594e-163
AP003086.2	0.18266	0.0177144	-3.36616	1.51122e-110	4.06281e-110
SMC2-AS1	0.58604	0.0371689	-3.97883	4.96445e-259	6.5214e-258
SATB1-AS1	1.1925	0.279541	-2.09285	1.85334e-164	7.98126e-164
AC139887.1	0.121733	0.819887	2.75171	4.02375e-246	4.28612e-245
AL133372.3	0.00417212	0.0323202	2.95358	1.22564e-106	3.17621e-106
LINC02380	0.000957816	0.0402286	5.39233	2.78567e-134	9.18255e-134
MMP2-AS1	0.0280867	0.114951	2.03306	1.26707e-63	2.32996e-63
AC091153.4	0.0747538	0.32121	2.1033	3.79827e-170	1.71544e-169
AP001029.1	0.222166	1.25613	2.49928	6.77363e-202	4.17628e-201
LINC00517	0.0429729	0.0101044	-2.08845	1.7333e-34	2.50497e-34
AL354733.1	0.22286	0.0221374	-3.33158	6.41277e-59	1.13306e-58
AC021683.3	0.523949	0.0834	-2.65131	1.75597e-185	8.99839e-185
REV3L-IT1	0.0154442	0.07012	2.18276	3.21312e-88	7.20497e-88
AC018616.1	0.000765106	0.0752563	6.62001	7.18003e-178	3.43909e-177
AC011899.1	0.0348347	0.00206078	-4.07926	6.83731e-103	1.7175e-102
AC103796.1	0.0232185	0.194737	3.06818	1.41156e-189	7.51799e-189
MYT1L-AS1	0.071815	0.0105078	-2.77282	6.94348e-106	1.79344e-105
AL137246.2	0.701803	0.0658315	-3.41422	4.04685e-239	3.82982e-238
UBE2E1-AS1	0.239781	0.985416	2.03901	2.68047e-247	2.88581e-246
CR381653.1	1.42549	0.174992	-3.02609	2.85799e-252	3.33164e-251
AP001381.1	0.0133979	0.0960596	2.84192	8.28266e-139	2.83373e-138
AL031727.2	0.0299741	0.160699	2.42257	3.02663e-129	9.59934e-129
AC004080.1	0.0141682	0.094996	2.74521	1.46825e-69	2.82148e-69
AC004917.1	0.00443099	0.0298478	2.75192	1.23708e-157	4.98302e-157
Z97192.3	0.083106	0.0152051	-2.4504	1.55863e-76	3.18465e-76
SPINT1-AS1	0.613173	0.095387	-2.68443	2.98639e-117	8.56853e-117
AC116456.1	0.706846	0.128317	-2.46168	2.15871e-68	4.12134e-68
AL139807.1	0.00484292	0.05386	3.47527	4.14755e-141	1.44712e-140
THRB-AS1	0.52655	0.0848999	-2.63274	4.12615e-203	2.58242e-202
BX255923.2	1.26605	0.11479	-3.46326	3.29447e-119	9.63303e-119
MEF2C-AS2	0.00470426	0.335353	6.15557	7.89696e-300	5.5052e-298
AL121759.1	0.00640551	0.0526433	3.03886	1.56453e-170	7.08415e-170
AL137024.1	0.0772742	0.511866	2.72771	3.73126e-183	1.8779e-182
AJ009632.2	0.207614	0.0492583	-2.07547	5.98926e-05	6.47083e-05
AL137026.1	0.665657	0.125354	-2.40877	5.01576e-182	2.5029e-181
AC135178.6	0.00812517	1.40558	7.43455	0	0
AC069281.1	0.0660743	0.297461	2.17054	1.77288e-138	6.04205e-138
AL513548.1	1.29517	0.0127742	-6.66376	2.61438e-286	9.95019e-285
AC005845.1	0.0881159	0.626935	2.83084	2.34007e-229	2.002e-228
AC080188.1	0.116663	0.559499	2.26179	5.22784e-212	3.62296e-211
AC023509.2	0.110865	0.0133894	-3.04963	4.69706e-12	5.50283e-12
AP001318.2	0.321449	1.44336	2.16677	1.56615e-278	3.52309e-277
AC007448.3	0.24561	0.0118669	-4.37135	5.95703e-219	4.56403e-218
AL135818.2	0.628197	0.118922	-2.4012	7.46875e-178	3.57495e-177
LINC01143	0.027327	0.221235	3.01718	1.01504e-158	4.12877e-158
AC245187.1	0.0156716	0.0812242	2.37376	8.56055e-70	1.64911e-69
AC125494.1	2.64568	0.0597069	-5.4696	1.15584e-280	3.14219e-279
AC006272.1	0.0114194	0.0541803	2.24628	5.43167e-81	1.15021e-80
AL078644.1	0.00935456	0.502846	5.7483	0	0
LINC00364	0.0152685	0.22337	3.87081	2.41308e-95	5.70343e-95
AL121768.1	1.35584	0.0829859	-4.03017	4.45025e-280	1.15199e-278
AL358944.1	7.00096e-05	0.273486	11.9316	3.78859e-253	4.47575e-252
AC103925.1	0.00970575	0.0971828	3.32379	1.10305e-72	2.18715e-72
AL513314.2	1.48606	0.141324	-3.39442	1.89508e-275	3.75867e-274
AC007614.1	0.556986	0.00447488	-6.95965	4.13438e-177	1.96028e-176
AC013460.1	0.525028	0.0602913	-3.12237	1.26239e-213	8.96015e-213
Z94057.1	0.0565958	0.476859	3.0748	1.34312e-167	5.96275e-167
AC005162.2	0.0242273	0.523525	4.43355	1.13583e-282	3.52306e-281
AL139393.1	0.142909	0.677625	2.24539	4.63894e-174	2.14745e-173
LINC00973	0.0142952	0.0608081	2.08873	1.57741e-56	2.73023e-56
AL031772.1	0.0842224	0.00944143	-3.15713	9.89438e-18	1.22738e-17
AC092145.1	0.0391978	0.00904988	-2.1148	4.05299e-36	5.93163e-36
AC006441.1	0.0190378	0.0947479	2.31523	9.63883e-107	2.50432e-106
LINC02549	0.00166493	0.197343	6.8891	2.12373e-215	1.53998e-214
AL354872.1	0.000770238	0.908008	10.2032	0	0
AC016822.1	0.00284239	0.239264	6.39535	1.15915e-162	4.90184e-162
AC245177.1	0.0554829	0.00109317	-5.66546	9.22252e-169	4.13077e-168
LINC02033	0.81767	0.118398	-2.78787	1.43334e-190	7.72754e-190
AC005722.3	0.00432823	0.100179	4.53266	0	0
AC247036.1	0.00600037	0.208758	5.12064	3.072e-129	9.73882e-129
SAPCD1-AS1	1.30973	0.1881	-2.7997	2.92711e-184	1.48486e-183
AL109923.1	0.0892528	0.0218703	-2.02893	8.05187e-31	1.12688e-30
AL031289.1	0.00400362	0.407008	6.66761	0	0
AC008554.1	1.68969	0.0774327	-4.44767	9.50874e-280	2.42576e-278
AL136317.2	0.626339	0.027768	-4.49545	6.3815e-272	1.11218e-270
CU633906.1	1.18058	0.023974	-5.62188	2.17039e-277	4.61683e-276
AL133415.1	0.177217	1.10395	2.63909	5.70101e-68	1.08459e-67
AC096564.1	1.1593	0.0408936	-4.82524	2.97106e-264	4.36727e-263
U62317.1	0.206586	3.26201	3.98095	8.236e-287	3.20385e-285
AC005064.1	0.126454	0.0069017	-4.19552	1.33977e-148	4.99383e-148
AC025263.1	0.0926584	0.469616	2.34149	2.86838e-129	9.10561e-129
IDH2-DT	0.158451	1.49075	3.23392	4.39194e-244	4.50783e-243
AC068870.1	0.121902	0.0288173	-2.08072	6.14316e-71	1.19387e-70
AC063948.1	0.247646	1.43163	2.53131	2.80574e-276	5.72615e-275
AL596094.1	0.26265	1.21922	2.21474	1.77628e-241	1.74432e-240
AL161629.1	0.0304841	0.29058	3.25281	2.11229e-151	8.04359e-151
AL121574.1	0.0707281	1.08604	3.94065	3.41925e-290	1.45909e-288
AC051619.3	0.178166	0.860451	2.27187	1.57154e-212	1.09557e-211
AL590004.3	0.0439075	0.328109	2.90164	9.10938e-139	3.11053e-138
AC021016.1	0.0947722	1.50257	3.98682	2.09857e-292	9.35192e-291
AC099811.3	0.053576	0.404542	2.91663	5.65366e-233	4.99466e-232
AL354733.2	0.291567	0.0273399	-3.41475	4.20531e-205	2.69423e-204
AC053503.4	0.00328678	1.04562	8.31346	0	0
DCTN1-AS1	1.65663	0.366624	-2.17588	8.20341e-207	5.39815e-206
AC109309.1	0.00775946	0.248071	4.99866	2.51527e-158	1.02016e-157
C7orf77	0.025444	0.172987	2.76526	7.477e-135	2.47278e-134
AC107214.1	0.0739322	0.48173	2.70395	1.29805e-253	1.54646e-252
AC005518.1	0.0535477	0.01246	-2.10352	4.14921e-30	5.7782e-30
AL583810.1	0.106129	0.0145243	-2.86928	1.56116e-114	4.36369e-114
RNF216-IT1	0.0023825	0.0742415	4.96168	2.25094e-116	6.38811e-116
AC025279.1	0.144324	0.0147645	-3.2891	7.55135e-253	8.89115e-252
AC016573.1	0.00774524	0.17412	4.49063	1.21297e-212	8.47275e-212
AC098934.2	0.164732	0.0158941	-3.37356	2.74705e-227	2.29714e-226
AP002768.1	0.0190934	0.184998	3.27636	1.0376e-95	2.45901e-95
LINC02520	0.0283908	0.403462	3.82894	1.90279e-146	6.94172e-146
LINC02054	0.759292	0.124448	-2.60911	4.61695e-110	1.23698e-109
FAM230G	0.00642608	0.0282557	2.13653	1.61129e-108	4.26348e-108
ANKRD62P1-PARP4P3	0.0414213	0.418235	3.33587	1.1099e-20	1.41727e-20
SLC6A1-AS1	0.306366	1.23093	2.00642	2.58594e-192	1.43142e-191
AC003001.1	0.0117204	0.0748448	2.67488	9.87105e-107	2.56371e-106
AL031709.1	0.166006	0.92972	2.48556	1.08844e-214	7.83607e-214
PACRG-AS3	1.41129	0.303713	-2.21623	3.12843e-177	1.48732e-176
CFLAR-AS1	0.490768	0.0437073	-3.48909	3.47562e-211	2.37822e-210
LINC02591	0.0345376	0.00199737	-4.11199	2.03372e-58	3.57539e-58
AP003469.2	0.11732	0.502097	2.09752	1.0615e-135	3.53882e-135
AL035252.2	0.411141	0.0432084	-3.25025	1.36551e-196	7.85505e-196
EAF1-AS1	0.398703	0.0600141	-2.73194	3.46075e-197	2.00718e-196
AL132656.3	0.0770617	0.0131224	-2.55398	1.61204e-110	4.3322e-110
LINC00945	0.0396486	0.413198	3.38149	9.33916e-248	1.01477e-246
AC078820.1	0.00407849	0.0627636	3.94382	3.80931e-135	1.26516e-134
AC016644.1	0.0125084	0.0572438	2.19422	8.32846e-77	1.70517e-76
AC002064.2	0.00466018	0.364383	6.28893	1.32763e-248	1.47909e-247
ZNF649-AS1	0.0435922	0.297519	2.77084	3.999e-196	2.27807e-195
Z98259.1	0.00824014	0.0446708	2.43859	1.29529e-77	2.66983e-77
AC073636.1	0.0119809	0.208068	4.11825	2.24995e-146	8.19973e-146
SIX3-AS1	1.42525	0.148068	-3.26688	1.12733e-163	4.81352e-163
AC004448.2	1.30545	0.172546	-2.91949	2.17525e-162	9.17672e-162
AC138932.1	2.90956	0.0175779	-7.37089	3.07877e-283	9.89847e-282
LINC00163	0.0362936	0.00824259	-2.13855	9.13116e-21	1.16726e-20
AC110023.1	0.0189505	0.277923	3.87437	1.5607e-252	1.82843e-251
AL138767.3	0.022612	0.513092	4.50406	2.16364e-233	1.92351e-232
AC135178.4	0.0582624	0.804578	3.78759	6.9246e-299	4.35322e-297
AC079203.1	0.426009	0.0112275	-5.24578	3.50513e-208	2.32607e-207
AL359094.1	0.0648097	0.0136565	-2.24662	1.74686e-09	1.98638e-09
AC090877.2	0.201063	0.0378537	-2.40914	1.48039e-117	4.26142e-117
AL162414.1	0.0103665	0.0493213	2.25028	3.08841e-81	6.54985e-81
MRPL23-AS1	0.775163	0.179249	-2.11254	1.56016e-216	1.15389e-215
AC017015.2	0.00561976	0.564876	6.65128	1.67688e-303	1.63985e-301
AC008438.1	0.442145	1.86546	2.07694	6.31393e-282	1.8601e-280
CATIP-AS1	0.389898	0.0913533	-2.09357	1.25236e-113	3.4675e-113
AL596087.2	0.0136621	0.561933	5.36215	1.66208e-189	8.84558e-189
AC245519.1	0.0208728	0.133445	2.67655	2.97544e-80	6.25562e-80
AC010536.2	0.00955534	0.404334	5.4031	2.6665e-248	2.95202e-247
AP003115.1	0.205947	0.00966477	-4.41339	3.69721e-127	1.1483e-126
AC091891.1	0.0120276	0.058645	2.28566	1.43447e-59	2.55699e-59
AC005537.1	0.260418	0.0364265	-2.83777	8.90659e-178	4.26028e-177
CU634019.1	1.01974	0.00246787	-8.69071	2.68652e-279	6.34757e-278
PSG8-AS1	0.769968	0.133474	-2.52824	2.43931e-191	1.33038e-190
WARS2-IT1	0.0446083	0.800885	4.16621	1.19735e-247	1.29701e-246
AC008105.1	2.18541	0.530458	-2.0426	2.56803e-219	1.97181e-218
AC078922.1	0.0264845	0.111681	2.07616	3.07193e-84	6.68194e-84
AC012615.3	3.04271	0.000197762	-13.9093	1.08072e-298	6.61683e-297
CRTC3-AS1	0.117401	0.557809	2.24832	1.67811e-237	1.5629e-236
AC068446.2	0.496097	0.00579113	-6.42063	4.08835e-283	1.30846e-281
ZBTB40-IT1	0.025123	0.185649	2.88549	8.2999e-145	2.97251e-144
AC008781.2	0.0213064	0.307594	3.85166	3.08918e-225	2.52331e-224
HCG25	4.0055	0.745549	-2.42561	4.55967e-279	1.05261e-277
AC008894.2	2.92764	0.0226483	-7.01419	3.21251e-282	9.66635e-281
MANCR	0.00518213	0.0641321	3.62943	3.62992e-141	1.2684e-140
AC079760.1	0.00484928	0.52156	6.74892	1.42263e-291	6.14525e-290
AC090912.1	0.032265	0.307603	3.25303	1.79017e-220	1.40207e-219
AC096719.1	0.0283291	0.223057	2.97706	1.86628e-155	7.37814e-155
AC025430.1	0.030375	0.194806	2.68108	7.66943e-179	3.70373e-178
LINC01470	0.0976427	0.0119072	-3.03567	1.99902e-60	3.58419e-60
AC078950.1	0.298433	0.0187189	-3.99484	4.74991e-56	8.18505e-56
AL137186.1	0.0115359	0.0956108	3.05105	1.12911e-99	2.75852e-99
AC002044.1	0.0657964	0.272822	2.05188	4.56154e-119	1.33158e-118
AL031595.2	0.0421879	0.00852261	-2.30746	3.95487e-105	1.01444e-104
AC084757.3	0.200846	0.830865	2.04852	1.14765e-210	7.79018e-210
LIVAR	0.0285892	0.127729	2.15955	2.50343e-88	5.61717e-88
AL138930.1	0.000779266	0.0418681	5.74759	5.9344e-124	1.79177e-123
AC004594.1	0.274919	0.0240689	-3.51376	3.17211e-09	3.60065e-09
AC009292.2	0.0452895	0.210559	2.21697	1.05887e-145	3.83315e-145
AP002884.3	0.285177	0.0115098	-4.63092	8.69364e-99	2.1093e-98
ANKRD34C-AS1	0.755666	0.142415	-2.40765	2.82991e-152	1.08704e-151
AP000322.2	0.305547	0.00071496	-8.73932	5.2669e-200	3.12947e-199
AL133383.1	0.00174256	0.0244303	3.80939	6.06843e-99	1.47439e-98
AC008937.2	0.00623051	0.0810293	3.70102	5.00875e-122	1.49371e-121
AC087301.1	0.0440677	0.475293	3.43102	1.35108e-250	1.54431e-249
LINC00923	0.264277	0.0140855	-4.22977	1.50559e-103	3.80369e-103
AC010307.3	0.0338201	0.00155545	-4.44248	2.64529e-78	5.47969e-78
CERNA3	0.00892751	0.0592089	2.72949	2.33488e-118	6.76818e-118
AC245297.2	2.95295	0.608833	-2.27804	1.64446e-274	3.16357e-273
AL049646.1	0.0501128	0.0116283	-2.10754	8.29814e-43	1.2895e-42
AC004691.1	0.0115875	0.0607193	2.38959	4.27941e-97	1.02418e-96
AC022217.3	0.0169439	0.137528	3.02088	9.03202e-122	2.68898e-121
AL138789.1	0.0183207	0.076779	2.06723	3.11076e-49	5.102e-49
PRR29-AS1	0.243949	0.0282459	-3.11047	1.59351e-156	6.34969e-156
AC073878.1	0.0580556	0.612886	3.40011	1.44709e-263	2.07515e-262
AC079921.1	0.054195	0.379072	2.80624	1.73297e-235	1.58465e-234
AC105053.1	0.042023	0.42545	3.33974	2.68916e-190	1.44097e-189
AL049840.6	0.120956	1.26974	3.39197	4.1728e-289	1.70818e-287
LINC02014	0.0219323	0.126327	2.52604	3.48584e-141	1.21926e-140
AP002954.1	0.049557	0.458793	3.21068	4.42561e-181	2.18059e-180
AL356441.1	0.0162864	0.0665086	2.02987	2.95459e-80	6.21363e-80
AC087241.2	0.012289	0.0965025	2.97319	2.96027e-225	2.42082e-224
LINC00891	0.310833	0.0130189	-4.57746	5.3401e-254	6.40539e-253
AC109439.1	0.00412478	1.08554	8.03988	2.8599e-245	3.01445e-244
AC073641.1	0.0174884	0.0802902	2.19882	8.48059e-128	2.65386e-127
AL391987.4	0.424108	0.0789595	-2.42525	3.51719e-141	1.22962e-140
AL158058.1	0.0428023	0.225301	2.39609	1.23067e-66	2.31565e-66
AC010327.4	0.511963	0.043822	-3.54631	4.86304e-255	5.97568e-254
AC092681.2	0.108893	0.0189163	-2.52521	2.26375e-59	4.02299e-59
AC023043.3	0.00736725	0.249571	5.08218	1.38576e-240	1.34027e-239
LINC02321	0.120276	0.554257	2.20421	9.62292e-152	3.67634e-151
AC010336.2	1.21328	0.300386	-2.01403	1.56911e-182	7.85785e-182
AC091132.1	0.529973	0.0302958	-4.12873	3.27213e-214	2.34853e-213
AC023421.1	0.0778392	0.822812	3.40199	2.53863e-164	1.0919e-163
LINC02391	0.0543829	0.830306	3.93242	2.83995e-279	6.68765e-278
GRM5-AS1	2.06971	0.019087	-6.7607	7.4496e-280	1.90737e-278
FARSA-AS1	0.0422984	0.369361	3.12636	4.9578e-222	3.93994e-221
GTF3C2-AS1	0.417191	0.0875059	-2.25326	3.08969e-134	1.01656e-133
AC005154.4	0.081018	0.421699	2.3799	4.13819e-170	1.86656e-169
AC078942.1	0.0699435	0.298135	2.0917	3.35701e-118	9.71105e-118
AC006116.8	0.302674	0.060694	-2.31814	2.57288e-234	2.30479e-233
AC009486.1	0.0262721	0.156916	2.57839	3.17672e-129	1.00663e-128
AL031595.3	0.0669921	0.0131	-2.35443	2.29677e-221	1.81499e-220
MIR4300HG	0.106074	0.552698	2.38142	5.90121e-169	2.64484e-168
AC010524.1	0.0133003	0.10045	2.91694	1.32349e-99	3.2323e-99
NCKAP5-IT1	0.00721062	0.055814	2.95243	4.03441e-80	8.47696e-80
NOP53-AS1	0.0757108	0.410286	2.43806	1.13061e-201	6.94646e-201
AC126614.1	0.0124139	0.307269	4.62947	4.95959e-235	4.51752e-234
AC092127.1	0.0307075	0.00507421	-2.59734	1.00877e-24	1.33435e-24
AC008537.2	0.277105	1.42712	2.36461	1.54227e-270	2.57937e-269
AC068831.5	0.0140338	0.176563	3.65321	2.14404e-238	2.01551e-237
BX470209.1	0.00552706	0.0313873	2.5056	2.89346e-71	5.64813e-71
AC104561.1	0.0375525	0.36388	3.27648	6.05506e-228	5.11195e-227
AL132800.1	0.0928081	0.625333	2.7523	1.04501e-232	9.22047e-232
AP000679.1	0.1473	0.0359772	-2.0336	9.96161e-43	1.54663e-42
KIAA1614-AS1	0.305285	0.0452501	-2.75416	2.98252e-52	4.97982e-52
AC104088.1	0.0246073	0.391029	3.99012	1.45616e-206	9.51097e-206
AC010618.3	0.0482008	1.03302	4.42167	1.19607e-307	1.25695e-305
AC009088.2	0.0202204	0.0999949	2.30604	1.54428e-91	3.54293e-91
AC005062.1	1.69362	0.0321178	-5.72059	5.2101e-282	1.54786e-280
LINC01831	0.115267	0.532997	2.20914	5.64838e-83	1.21808e-82
LINC01405	0.110109	0.0185448	-2.56984	4.43542e-26	5.93723e-26
AL109924.1	0.00233013	0.0450071	4.27167	2.48978e-119	7.2892e-119
AC079384.1	0.000609943	0.064928	6.73402	7.52303e-153	2.90404e-152
LINC01645	0.0111897	0.105252	3.2336	3.16384e-121	9.38753e-121
LINC02249	0.138053	0.0129561	-3.41351	9.17733e-68	1.74171e-67
RMDN2-AS1	0.13107	0.0127733	-3.35913	7.41267e-38	1.10204e-37
AL121578.1	0.00139889	0.0658331	5.55646	4.5971e-115	1.2906e-114
LINC02433	0.267256	0.0380753	-2.8113	1.22056e-46	1.96255e-46
AP001043.1	0.156242	0.00333309	-5.55078	1.09103e-213	7.78316e-213
LINC01167	0.307517	0.0227175	-3.75879	7.61402e-152	2.91677e-151
AL445623.1	0.00495378	0.328439	6.05095	8.01288e-183	4.02416e-182
AC073848.1	0.017222	0.104531	2.60161	1.25285e-115	3.53276e-115
PKNOX2-AS1	0.0748387	0.3763	2.33003	3.42577e-155	1.35055e-154
AP000322.1	0.851748	0.00146767	-9.18076	7.40894e-287	2.89813e-285
CU633967.1	1.47921	0.0114384	-7.01479	9.19255e-284	3.05306e-282
AL359851.1	0.0232171	0.00255389	-3.18442	6.15452e-30	8.5522e-30
AC130469.1	0.0928463	0.51943	2.48401	4.84205e-192	2.66559e-191
AC125611.3	1.53569	0.00518438	-8.2105	1.40628e-217	1.05449e-216
LINC00944	0.0240944	0.105223	2.12667	1.5999e-118	4.64531e-118
AC080013.1	1.99657	0.361917	-2.4638	3.47138e-248	3.81311e-247
AL445363.2	0.0642181	0.00202027	-4.99036	4.14601e-70	8.01099e-70
AC009630.2	0.325749	0.0119675	-4.76657	1.40417e-228	1.1955e-227
Z82186.1	0.0353258	0.00547939	-2.68863	5.68402e-53	9.55159e-53
AP001094.1	1.67642	0.199993	-3.06736	8.3822e-165	3.61415e-164
AC093390.1	0.0908787	0.00996146	-3.18951	6.35396e-189	3.35369e-188
AC006141.1	0.0415	0.00827766	-2.32582	1.10942e-16	1.36253e-16
AL359644.1	0.00460332	0.138183	4.90776	2.52959e-211	1.73764e-210
AC105219.1	0.314855	0.0100039	-4.97605	2.19564e-286	8.4019e-285
AC093010.2	0.0103504	7.32594	9.46718	0	0
AC010425.1	0.109552	0.658535	2.58765	2.6931e-190	1.44199e-189
AC084876.1	0.779715	0.145437	-2.42255	7.74084e-224	6.23607e-223
LINC01140	1.25901	0.155146	-3.02059	2.7489e-260	3.70786e-259
CHL1-AS1	0.0461741	0.282259	2.61186	4.67286e-132	1.51971e-131
AC104985.1	0.277608	1.13068	2.02607	6.15e-176	2.88681e-175
AC120349.1	0.00613045	0.228101	5.21753	1.82868e-163	7.79877e-163
AC024267.6	2.16519	0.0496568	-5.44636	3.89405e-280	1.01548e-278
AC136698.1	0.0536045	0.00118293	-5.50192	1.0366e-113	2.87237e-113
AC006946.3	0.714757	0.147821	-2.2736	7.1909e-206	4.6408e-205
AC015911.8	0.0986249	0.0116775	-3.07822	6.39276e-85	1.39744e-84
AC091917.2	0.00978481	0.0919956	3.23295	6.88802e-141	2.39736e-140
DBET	0.00124108	0.0261428	4.39674	6.87291e-91	1.57219e-90
AC124854.1	0.26093	1.09999	2.07575	3.30733e-145	1.18932e-144
LINC01956	0.0800124	0.548586	2.77742	4.4484e-136	1.48724e-135
LINC00501	0.0942289	0.0201277	-2.22699	9.55118e-131	3.07217e-130
VCAN-AS1	0.0486126	0.302921	2.63954	8.14686e-181	4.00294e-180
AL358154.1	0.0368876	0.245488	2.73445	1.35992e-109	3.62558e-109
LINC01778	0.218956	1.32922	2.60187	6.0179e-263	8.44065e-262
AL133371.1	0.0113432	0.0913782	3.01002	3.40317e-113	9.3747e-113
AL359878.2	0.0144133	0.313417	4.44261	3.1385e-254	3.79042e-253
AC027309.1	0.578657	0.0157065	-5.20328	3.88282e-118	1.12275e-117
AC113615.1	0.0713591	0.0127414	-2.48557	1.78128e-189	9.47278e-189
EIPR1-IT1	0.109791	0.517832	2.23772	5.07186e-178	2.43097e-177
LINC00303	0.0205506	0.0905931	2.14022	6.91859e-115	1.93924e-114
AC132938.3	0.245805	1.72568	2.81158	2.56555e-280	6.81662e-279
LINC00222	0.111184	0.0160156	-2.7954	5.97112e-135	1.97848e-134
LINC02047	0.0268137	0.180795	2.75331	3.99504e-85	8.75204e-85
LINC02115	0.00648575	0.143201	4.46463	1.49434e-205	9.60879e-205
AC026780.1	0.00251086	0.0823652	5.03578	6.08052e-231	5.26604e-230
AC002563.1	0.0268385	0.242467	3.17541	1.36133e-177	6.49399e-177
GUSBP11	3.6452	0.371747	-3.2936	1.66424e-279	4.08289e-278
AC022973.4	0.244927	0.0574482	-2.09201	2.71126e-141	9.49279e-141
AL359399.1	0.0132025	0.462558	5.13075	6.46285e-222	5.13021e-221
AL139275.1	0.220638	0.0485849	-2.1831	6.84206e-46	1.09042e-45
AL162258.1	0.629376	0.00433211	-7.18271	3.84855e-276	7.80912e-275
AC109454.2	0.218529	0.962445	2.13888	4.69166e-260	6.2683e-259
TMLHE-AS1	0.185967	0.0207698	-3.16249	1.28775e-110	3.46599e-110
LINC02283	0.862855	3.86119	2.16185	2.99661e-164	1.28732e-163
AL022341.2	1.17049	0.160867	-2.86318	3.42424e-260	4.60996e-259
AC068535.1	0.465471	2.6947	2.53336	7.65449e-264	1.10668e-262
AP001458.1	7.00096e-05	0.801831	13.4835	4.70088e-256	5.8686e-255
LINC01700	0.428267	0.0244943	-4.12799	1.24229e-248	1.38621e-247
AL353597.1	0.00942903	0.467533	5.63181	3.28147e-185	1.67548e-184
AC004923.4	0.117014	0.52157	2.15618	9.01626e-213	6.31676e-212
AC005746.3	0.0129703	0.167347	3.68956	2.82971e-160	1.16514e-159
SPATA3-AS1	0.0659966	0.329405	2.3194	1.17752e-196	6.7847e-196
AL357873.1	0.0291292	0.17752	2.60745	6.60405e-115	1.85182e-114
AC093484.4	0.0702582	0.81803	3.54141	3.07521e-283	9.89847e-282
LINC01995	0.0313409	0.206789	2.72204	2.00469e-109	5.33447e-109
AC078923.1	0.00942446	0.0989283	3.3919	4.57015e-200	2.72237e-199
CPEB1-AS1	0.590996	0.124516	-2.24682	1.88285e-243	1.91301e-242
HGC6.3	0.839417	0.208242	-2.01112	8.19765e-132	2.65989e-131
AC002116.2	0.0617559	0.310492	2.32991	1.35443e-151	5.16886e-151
AL596223.1	0.0449913	0.00489568	-3.20007	3.67512e-77	7.54859e-77
LINC01054	0.0157626	0.0730748	2.21287	1.03942e-79	2.1749e-79
AL133371.3	0.00778969	0.221692	4.83085	2.32849e-251	2.68769e-250
AC010186.3	0.222218	0.928015	2.06217	1.29107e-262	1.80725e-261
TMEM51-AS1	1.73595	0.280732	-2.62846	7.55214e-272	1.31295e-270
AL356752.1	0.0869791	0.010796	-3.01017	7.38407e-53	1.23907e-52
AC005342.1	0.0443093	0.204995	2.20991	2.17377e-153	8.43279e-153
AC003035.1	0.0730762	0.294121	2.00894	2.74722e-131	8.86896e-131
LNCAROD	0.012129	0.086339	2.83155	6.0701e-144	2.16403e-143
AC022960.1	0.0172156	0.118634	2.78474	9.93344e-134	3.2546e-133
AC084117.1	0.068854	0.300242	2.12452	6.52448e-83	1.40658e-82
AL033523.1	0.00881969	1.05246	6.89882	0	0
AC079601.1	0.168829	0.0355246	-2.24867	5.34776e-39	8.03363e-39
LINC00689	0.245684	2.0125	3.03411	4.00382e-109	1.06341e-108
AL133297.1	0.0280394	0.175542	2.64629	1.18401e-168	5.28301e-168
AP002884.1	2.27332	0.00636948	-8.47941	1.35653e-292	6.12264e-291
JAZF1-AS1	1.10245	0.260065	-2.08377	6.66339e-210	4.48966e-209
ALG13-AS1	0.00653464	0.462081	6.1439	2.99938e-266	4.61106e-265
AL772363.1	0.174119	0.00547476	-4.99113	1.99091e-210	1.34659e-209
LINC02395	0.351114	0.0272533	-3.68744	5.12357e-147	1.87695e-146
CAMTA1-DT	0.0814311	1.54835	4.24901	3.86877e-299	2.45405e-297
AC026992.2	0.181152	0.0347312	-2.3829	3.54862e-177	1.68481e-176
AC010649.1	2.44108	0.0302231	-6.33572	5.92847e-212	4.09641e-211
AC211486.5	0.0901431	0.00159959	-5.81644	1.79203e-113	4.95977e-113
AL133330.1	0.0268497	0.27381	3.3502	5.40093e-168	2.40379e-167
AC097478.1	0.278298	0.00331285	-6.39242	6.29946e-211	4.2896e-210
CRYZL2P-SEC16B	0.519306	0.0484868	-3.42092	4.08359e-242	4.05537e-241
AC079907.1	0.052854	0.444814	3.07312	9.6744e-235	8.74422e-234
AL157786.1	1.37009	0.1869	-2.87394	7.64854e-279	1.7372e-277
Z97205.1	0.0169063	0.177251	3.39016	1.56625e-180	7.66365e-180
AP005271.1	0.0156917	0.379448	4.59583	1.06954e-205	6.88358e-205
ELDR	0.0117173	0.215535	4.20122	1.96469e-58	3.45489e-58
LINC00313	0.290074	0.0132037	-4.45741	1.71693e-112	4.69837e-112
AL158847.1	0.0712561	0.605156	3.08622	2.47833e-167	1.09886e-166
AC124319.1	3.38538	0.0631267	-5.74492	2.81528e-282	8.58112e-281
LINC01349	0.00036207	0.289136	9.64126	6.11964e-224	4.94133e-223
AC011726.2	0.00830918	0.0754412	3.18258	8.93556e-167	3.94206e-166
AP001062.2	7.00096e-05	0.337819	12.2364	1.09825e-187	5.71527e-187
LAMTOR5-AS1	1.57582	0.313795	-2.32821	3.0929e-278	6.93539e-277
AP002748.4	0.0433034	1.70012	5.29502	0	0
RAPGEF4-AS1	0.668287	0.0683522	-3.28941	1.92374e-234	1.72548e-233
AL672277.1	0.0993327	0.435051	2.13084	4.27119e-42	6.58639e-42
AC097534.1	0.0339339	0.688288	4.34221	8.69536e-306	8.87304e-304
AC007347.1	0.00175312	0.091697	5.70888	9.5269e-129	3.00802e-128
AC129492.1	4.19572	0.106499	-5.30001	2.41135e-281	6.8186e-280
RBM5-AS1	0.870889	0.208119	-2.06508	3.25211e-200	1.94546e-199
AC073578.1	0.0128083	0.0906562	2.82333	7.01937e-82	1.49813e-81
FAM230E	0.0452162	0.000303393	-7.21951	5.31819e-106	1.37515e-105
AC123768.1	0.00623488	0.327514	5.71505	0	0
CYP1B1-AS1	0.578803	0.066502	-3.1216	2.0103e-222	1.60301e-221
AP001172.1	0.125185	0.999747	2.9975	4.54283e-220	3.53047e-219
AC126755.2	0.771517	0.00118993	-9.34067	2.39698e-280	6.41716e-279
AC073046.1	0.102282	0.660278	2.69052	5.42042e-188	2.82287e-187
AL354754.1	0.0790245	0.454951	2.52534	1.97322e-156	7.84939e-156
AC006487.2	0.0767263	0.365917	2.25372	4.65449e-139	1.59476e-138
AC138035.1	1.8824	0.268198	-2.8112	1.06269e-271	1.83392e-270
AC015853.1	0.274633	0.0632038	-2.11942	2.56065e-91	5.86708e-91
AC007920.1	0.0153023	0.0617049	2.01164	9.93412e-59	1.7526e-58
AL049874.3	0.0157642	0.0670561	2.08872	3.44116e-55	5.89089e-55
AC079942.1	0.00484957	0.0602992	3.63621	4.3564e-97	1.04225e-96
AC093591.2	0.26161	0.0414842	-2.65678	2.36323e-228	2.00718e-227
AC024651.1	0.0101471	0.0851827	3.06949	3.10669e-74	6.24442e-74
AC093330.1	5.87051	0.0407154	-7.17177	4.10844e-278	9.15427e-277
AC022039.1	0.228047	0.0165221	-3.78686	2.69786e-107	7.05632e-107
LINC01775	0.0201689	0.303836	3.91309	5.3995e-205	3.44365e-204
AC005841.1	0.00816323	0.321616	5.30006	4.6646e-248	5.10785e-247
LINC02500	0.187225	0.0382526	-2.29115	1.6159e-43	2.52947e-43
AC010931.1	0.000242196	0.201878	9.70309	0	0
AC092634.4	0.153923	0.00548228	-4.81129	2.19298e-75	4.44211e-75
AC113189.2	0.130506	0.000837412	-7.28397	1.98812e-135	6.61546e-135
AC017007.4	0.00767189	0.104612	3.76932	3.2405e-164	1.39124e-163
AC126773.3	0.0186907	0.188223	3.33206	6.07008e-181	2.98669e-180
MAL2-AS1	0.0942288	0.00264741	-5.15352	2.02983e-62	3.69877e-62
AL590133.1	0.0442387	0.377131	3.09169	1.75915e-237	1.63406e-236
AC073869.1	3.3119	0.388717	-3.09087	1.74911e-279	4.25566e-278
LUNAR1	0.0794248	0.0167545	-2.24504	5.95679e-117	1.70149e-116
AC010735.1	0.0871696	0.0181483	-2.26399	1.8605e-45	2.95174e-45
AC009654.1	0.0811019	0.355547	2.13223	2.06673e-80	4.35814e-80
AL591212.1	0.31811	0.0207729	-3.93675	1.87328e-170	8.47671e-170
AC004973.1	0.0144672	0.0639609	2.1444	1.22179e-111	3.31124e-111
AC243654.1	0.0149015	0.0977121	2.71308	6.66877e-113	1.83489e-112
AL513318.1	0.00166315	0.046589	4.808	1.16467e-245	1.23501e-244
AP000442.1	0.0119538	0.596198	5.64025	0	0
AC103719.1	0.0484064	0.410008	3.08238	1.19744e-189	6.38241e-189
AC099850.3	0.146827	2.41796	4.0416	9.61097e-292	4.22943e-290
SLC12A9-AS1	0.0501377	0.666427	3.73248	3.69957e-282	1.10845e-280
AC078845.1	0.0145251	0.0946844	2.70458	4.76595e-131	1.5365e-130
PLAC4	0.0431089	0.00424441	-3.34435	5.29545e-60	9.47047e-60
AL118511.1	0.0998277	0.667131	2.74046	7.38337e-250	8.35793e-249
LMNB1-DT	0.00400538	0.0763978	4.25352	6.27196e-196	3.55849e-195
AL031658.1	0.709741	0.170243	-2.0597	3.78896e-173	1.74025e-172
FZD10-AS1	1.45667	0.192577	-2.91916	5.61195e-244	5.74328e-243
AC006270.1	0.00828144	0.196833	4.57095	8.22313e-246	8.73289e-245
AP002340.1	0.0444925	0.306594	2.7847	3.81912e-180	1.86222e-179
AP000697.1	0.0061337	0.167733	4.77327	9.70292e-119	2.8219e-118
AC067773.1	1.87755	0.0679093	-4.7891	5.26911e-280	1.35897e-278
LINC01378	0.314389	0.0464445	-2.75897	9.04622e-38	1.34377e-37
AP003170.3	0.0460582	0.430377	3.22407	1.73967e-217	1.30309e-216
AC010618.2	0.0306472	0.615606	4.32818	6.71078e-298	3.91679e-296
AL390728.4	2.24459	0.0745834	-4.91145	4.93716e-281	1.35263e-279
AC007639.1	0.0318643	0.160825	2.33549	6.455e-155	2.53909e-154
AL359091.3	0.0291945	1.78688	5.9356	0	0
AC026150.3	0.614148	0.145571	-2.07686	1.25993e-188	6.62521e-188
LINC01793	0.0773814	0.0137054	-2.49725	7.39216e-82	1.57674e-81
AC011933.3	0.094181	0.520173	2.46548	9.59149e-216	7.02013e-215
TTN-AS1	2.27181	0.223882	-3.34303	1.04059e-279	2.61672e-278
AC016292.1	0.0191914	0.176543	3.20149	1.78206e-128	5.60907e-128
AC015921.1	0.0335377	0.0041067	-3.02973	4.53401e-30	6.31033e-30
AC073370.1	0.00226092	0.0821824	5.18385	6.49891e-146	2.35749e-145
AP005131.5	0.00735463	0.0554229	2.91376	2.6717e-83	5.77216e-83
AC068389.1	0.123339	0.0210316	-2.552	0.0139848	0.0145446
AL445193.2	0.0322032	0.261602	3.0221	4.33089e-136	1.44932e-135
AC016735.1	0.0346931	0.563398	4.02143	2.24586e-258	2.91755e-257
AC100827.4	0.0814425	0.0150615	-2.43492	1.78266e-115	5.02068e-115
TUSC8	0.137503	0.0342308	-2.00609	4.93532e-48	8.01606e-48
AL590714.1	7.00096e-05	0.0794892	10.149	8.15904e-161	3.38326e-160
AL049541.2	0.0536442	0.242152	2.17442	1.19166e-73	2.38433e-73
AC106017.2	0.234582	0.000411036	-9.15661	4.80924e-264	7.01074e-263
AC066613.2	0.00191504	0.0546768	4.83548	2.06274e-163	8.78097e-163
AL391832.3	0.0131073	0.123644	3.23775	2.26092e-178	1.08589e-177
AC133550.2	0.328418	0.00159338	-7.6873	2.18849e-242	2.1857e-241
AL391840.1	0.132513	1.44477	3.44663	1.30289e-258	1.69882e-257
AC008035.1	0.129125	0.627055	2.27982	4.73487e-201	2.88393e-200
AC068533.3	0.00880574	0.193183	4.45538	1.22987e-241	1.20943e-240
AL355304.1	0.0298816	0.187824	2.65205	1.79386e-169	8.07067e-169
AC121338.2	0.052705	0.0103714	-2.34533	8.06978e-33	1.14949e-32
BX005019.1	0.388037	0.0601282	-2.69008	1.30778e-100	3.22977e-100
AC139099.1	0.571309	0.0153149	-5.22126	3.10504e-233	2.75347e-232
LINC01340	0.00865969	0.200663	4.53431	6.55755e-213	4.60795e-212
AL118523.1	0.0106177	0.142514	3.74655	1.09897e-130	3.53005e-130
AC147651.1	0.639643	0.0222523	-4.84524	4.15468e-286	1.56434e-284
AC015987.1	0.0490172	0.27054	2.46448	1.56971e-119	4.60898e-119
AL049869.2	0.0120659	0.44099	5.19174	1.54565e-304	1.5328e-302
AL035071.2	0.0238535	0.264262	3.46969	2.77364e-239	2.63552e-238
AC011603.2	5.66982	0.113764	-5.63919	1.57939e-272	2.84411e-271
AL117339.3	7.00096e-05	0.436314	12.6055	0	0
AP005264.3	0.251184	0.00180952	-7.11699	4.90399e-154	1.90979e-153
AC027801.4	0.00264024	0.176827	6.06552	1.19954e-206	7.86401e-206
CALML3-AS1	0.231789	0.0286269	-3.01737	1.55685e-185	7.98963e-185
AL357140.2	0.0525393	0.566955	3.43177	2.53161e-273	4.71562e-272
AC123768.3	0.6207	0.0699752	-3.14898	5.10955e-251	5.8689e-250
AC108693.2	0.0158544	0.356531	4.49107	7.67527e-261	1.03926e-259
LINC00326	0.101924	0.0168606	-2.59577	1.66583e-22	2.15886e-22
PABPC1L2B-AS1	1.72867	0.00415525	-8.70051	2.31584e-288	9.37118e-287
OGFR-AS1	0.125591	0.57648	2.19854	2.11754e-232	1.85905e-231
AC253536.3	0.172567	0.691236	2.00202	2.2023e-157	8.8406e-157
AC022973.3	0.0188073	0.344051	4.19326	8.52114e-268	1.35129e-266
AC008667.2	0.121913	0.565983	2.21491	1.44352e-161	6.03913e-161
LINC02542	0.0426009	0.460787	3.43514	4.18318e-221	3.29093e-220
AC009139.2	1.22252	0.00321058	-8.57281	7.14667e-252	8.30358e-251
AC073050.1	0.0964987	0.413113	2.09796	1.81519e-104	4.62567e-104
AL133304.3	0.380146	1.95182	2.36019	8.70023e-208	5.75736e-207
AC080038.2	0.722024	0.163556	-2.14227	1.26908e-145	4.58941e-145
AC079760.2	0.0114933	0.0651013	2.5019	6.24658e-165	2.69499e-164
LINC02028	0.451627	0.063514	-2.82999	8.60223e-175	4.00319e-174
AC002091.2	0.0334103	0.601264	4.16963	6.69956e-265	9.99398e-264
AP000812.1	0.00240129	0.133128	5.79286	5.95642e-150	2.23914e-149
AC107398.2	0.071458	0.319665	2.16139	4.10075e-153	1.58558e-152
AC091544.2	0.0872491	0.0168761	-2.37016	8.81041e-93	2.04059e-92
LINC02642	0.0355304	0.569724	4.00314	1.66877e-268	2.67649e-267
AP005482.2	0.00247687	1.39988	9.14256	0	0
LINC02138	0.144912	0.0182037	-2.99288	3.52336e-61	6.35939e-61
AC007278.1	0.0666502	0.0142638	-2.22425	6.42087e-41	9.81106e-41
AL139288.1	0.190551	1.15378	2.59812	4.41327e-256	5.53901e-255
AC092338.1	2.75319	0.105242	-4.70932	1.15708e-281	3.33894e-280
LINC01833	1.1537	0.0598878	-4.26787	9.06705e-153	3.49623e-152
HOXD-AS2	0.0761328	0.77372	3.34522	8.16904e-199	4.81727e-198
LINC01982	0.0198778	0.228739	3.52447	6.37456e-119	1.85775e-118
AC012349.1	0.0836497	0.00572897	-3.86801	2.94064e-32	4.166e-32
AC008264.2	2.7902	0.0587646	-5.56928	1.78798e-280	4.80501e-279
AP000943.2	0.0123748	0.111258	3.16844	7.11473e-196	4.03015e-195
OBSCN-AS1	1.79019	0.244725	-2.87088	5.58073e-212	3.85991e-211
AC090692.1	0.103025	1.9027	4.20698	1.6218e-263	2.31866e-262
AC087354.1	0.0852276	0.0076434	-3.47903	2.53455e-112	6.92502e-112
AC103740.1	0.437261	0.0241248	-4.17991	1.84681e-223	1.48103e-222
PGM5P3-AS1	0.153704	0.0226592	-2.76199	6.19631e-40	9.38645e-40
AC239809.3	2.16992	0.174186	-3.63894	1.59256e-279	3.93445e-278
AC087273.2	0.218876	1.08539	2.31003	1.27958e-201	7.85486e-201
NR2F2-AS1	0.643659	0.112605	-2.51502	2.84152e-199	1.67986e-198
AP001767.2	0.256242	1.18053	2.20386	1.76243e-219	1.3562e-218
AL133371.2	0.0327534	1.20323	5.19912	0	0
AC026620.1	0.0695537	0.425079	2.61153	2.55134e-127	7.94516e-127
STAG3L5P-PVRIG2P-PILRB	4.70249	0.935775	-2.32919	1.79964e-279	4.32466e-278
AC124283.2	0.117711	0.637616	2.43744	1.38069e-207	9.12812e-207
LINC01305	0.314945	0.0621728	-2.34075	1.4993e-78	3.11496e-78
AC016590.1	1.77509	0.277376	-2.67798	4.07067e-277	8.53023e-276
AF127577.5	0.0403493	0.241563	2.58178	1.02158e-184	5.19344e-184
AL136982.1	0.131383	0.00768221	-4.09612	4.17844e-242	4.14371e-241
AC092535.2	0.0974926	0.00484504	-4.33071	4.69822e-84	1.01973e-83
LINC00304	0.889017	0.106736	-3.05817	1.35659e-217	1.0194e-216
AL356966.1	0.170116	0.0380758	-2.15957	1.70084e-164	7.32902e-164
AL161935.1	0.09022	0.577055	2.67719	1.49961e-193	8.36667e-193
AC090826.1	0.071748	0.00482351	-3.89478	3.06842e-166	1.34609e-165
AC007038.1	0.388145	1.56061	2.00744	1.15522e-274	2.24075e-273
HCG9	0.0534544	0.273148	2.35331	5.48909e-181	2.70271e-180
AP000907.2	0.0469977	0.234304	2.31772	8.00312e-144	2.85028e-143
AC099684.2	0.0540731	0.0108007	-2.32378	1.12424e-28	1.54244e-28
AC010401.1	0.0556042	0.0123023	-2.17626	7.90162e-100	1.93447e-99
TTLL7-IT1	0.0835266	0.008096	-3.36696	3.13066e-151	1.19023e-150
LINC01588	0.165559	0.0250351	-2.72531	1.51641e-202	9.44033e-202
FOXCUT	0.0549532	0.402342	2.87215	1.5536e-198	9.12332e-198
MYO16-AS1	0.0104031	0.0842453	3.01759	1.0434e-134	3.4475e-134
AL132989.1	0.145518	1.54506	3.4084	1.22449e-280	3.316e-279
AL353593.2	0.244425	0.0209977	-3.54109	1.01866e-183	5.14518e-183
AC115837.1	0.753583	0.00336621	-7.8065	4.98971e-295	2.45682e-293
AC073941.1	0.00856722	0.590992	6.10817	6.1896e-262	8.59586e-261
AC008750.3	0.0322301	0.204081	2.66266	1.60217e-72	3.16967e-72
FGF12-AS3	0.0147439	0.202748	3.7815	1.65044e-158	6.70556e-158
AC009021.2	0.113273	0.0277915	-2.02709	1.34693e-15	1.63512e-15
AC246785.3	1.37407	0.0659691	-4.38052	2.60746e-248	2.8912e-247
AP001059.2	0.49278	0.00198372	-7.95659	9.09102e-228	7.63841e-227
FO704657.1	0.0482524	0.235197	2.2852	5.5935e-177	2.65032e-176
AC116903.1	0.95484	0.00708814	-7.07371	7.64231e-136	2.55263e-135
AC087893.2	0.0032256	0.0356348	3.46565	1.47313e-136	4.94861e-136
AL627309.5	1.62697	0.0278857	-5.86651	5.9333e-279	1.36524e-277
AL049871.1	0.0777592	0.522601	2.74862	1.64835e-87	3.67511e-87
AC068473.1	0.0065345	0.0464456	2.82939	4.70987e-149	1.75927e-148
AC018752.1	0.0305469	0.679186	4.47471	6.16391e-271	1.05085e-269
LINC01076	0.00730945	0.116826	3.99846	3.46457e-141	1.21243e-140
LINC01235	0.337677	1.5047	2.15576	4.10492e-135	1.36269e-134
AC138894.2	0.402547	0.000217116	-10.8565	9.071e-129	2.86536e-128
AL133523.1	0.184192	1.10712	2.58753	1.09944e-237	1.02804e-236
Z94721.2	0.0799058	0.0146923	-2.44324	3.34217e-138	1.13737e-137
AC109466.1	0.269438	0.00993716	-4.76097	2.70772e-29	3.73459e-29
LIMS1-AS1	0.0108443	0.178388	4.04001	6.10861e-213	4.30107e-212
AC063919.1	0.0337667	1.5771	5.54553	0	0
LINC02620	0.00501772	0.085238	4.08639	2.03221e-112	5.55682e-112
AC024560.1	0.517409	0.11053	-2.22686	4.28811e-191	2.32967e-190
AC006026.3	7.00096e-05	0.819752	13.5153	5.45282e-295	2.6662e-293
AC004148.1	0.0135019	2.46924	7.51476	0	0
LINC02234	0.107463	0.606382	2.49639	6.28343e-183	3.15786e-182
AC026470.2	7.00096e-05	0.0664523	9.89055	5.49408e-170	2.47655e-169
ADGRL3-AS1	0.0182739	0.0954456	2.3849	8.33649e-194	4.67334e-193
AC022272.1	0.0483945	0.254385	2.3941	2.74516e-168	1.22333e-167
NADK2-AS1	0.0973931	0.610327	2.64769	2.00978e-199	1.19015e-198
AC083862.1	0.0930522	0.668338	2.84447	3.73475e-263	5.30169e-262
CT62	0.0769171	0.00944574	-3.02557	1.31972e-96	3.14562e-96
LINC01426	0.0489151	0.38661	2.98253	3.62379e-95	8.55923e-95
AL132711.1	0.0486348	0.391652	3.00951	8.81297e-79	1.83369e-78
AC066612.2	1.73307	0.100121	-4.11352	3.80447e-273	7.04928e-272
AL121694.1	0.570414	0.00630754	-6.49879	2.17152e-158	8.81248e-158
AC104248.1	0.00534476	0.200707	5.23082	3.05133e-242	3.03881e-241
AC107021.1	0.0201939	0.12187	2.59336	1.00936e-168	4.51517e-168
AL590822.2	0.16955	0.00897519	-4.23962	3.39885e-246	3.62596e-245
AL391987.3	0.483062	0.00167408	-8.17269	1.0966e-241	1.07988e-240
BX571846.1	0.378495	0.00799922	-5.56427	3.69455e-230	3.18791e-229
AC026150.1	0.860641	0.0772897	-3.47706	9.46373e-269	1.52481e-267
AC011298.1	0.0776763	0.00701282	-3.46941	9.41219e-160	3.85298e-159
AC007365.1	0.0498057	0.298539	2.58354	7.06951e-158	2.85579e-157
LINC02197	0.0973389	0.0117307	-3.05273	9.74696e-181	4.7858e-180
AL162727.2	0.00497726	0.0652588	3.71275	2.87718e-105	7.39622e-105
AC024270.3	0.0822031	0.498084	2.59912	1.84006e-197	1.07073e-196
AC068418.2	0.222716	0.0104544	-4.41302	4.3603e-243	4.40471e-242
AC027801.1	0.0088831	0.261503	4.87962	4.20341e-292	1.8614e-290
AC009107.2	0.189717	0.945381	2.31704	4.21811e-275	8.27291e-274
AC243654.3	0.0330438	0.160291	2.27824	1.9127e-130	6.11873e-130
AC117500.1	0.0955722	0.0237018	-2.0116	2.46163e-82	5.27461e-82
AC108136.1	0.00860092	0.0602323	2.80797	5.69954e-75	1.15152e-74
FAM223A	0.312522	0.001503	-7.69997	1.17138e-292	5.3211e-291
AC093525.6	2.5126	0.264057	-3.25026	6.09384e-279	1.39761e-277
AC113189.4	0.116708	0.00817111	-3.83623	6.8672e-70	1.32362e-69
L3MBTL4-AS1	0.115786	0.506993	2.13051	3.65749e-169	1.64132e-168
AC012625.1	0.0182329	0.25961	3.83173	1.60887e-195	9.09886e-195
AC005224.2	0.010062	0.0403154	2.00242	1.20502e-31	1.69792e-31
AC008728.1	0.00846728	0.049868	2.55814	4.20045e-100	1.03086e-99
AL591719.2	0.0206184	0.118155	2.51867	5.4041e-71	1.0514e-70
AC092384.1	0.853552	0.094308	-3.17803	4.12201e-257	5.23882e-256
BX284668.5	2.68863	0.394608	-2.76838	8.62124e-274	1.6274e-272
AC016245.1	0.0269112	0.00434479	-2.63085	3.6466e-32	5.15991e-32
AL390786.1	0.0250503	0.532481	4.40983	2.19794e-196	1.25921e-195
LINC01629	0.005671	0.0605485	3.41642	1.64787e-98	3.98581e-98
AL157392.2	0.0116766	0.103519	3.14821	4.0551e-161	1.68847e-160
AC009511.2	7.00096e-05	0.0397342	9.14861	8.54728e-149	3.18757e-148
C5orf60	0.130499	0.0133292	-3.29138	1.35461e-163	5.7805e-163
AC078993.1	0.0489889	0.297988	2.60473	2.98996e-196	1.71075e-195
AP001271.1	0.0277179	0.154011	2.47414	9.87931e-89	2.22593e-88
AC104758.1	0.0324439	0.329436	3.34398	1.79088e-233	1.59413e-232
AC024610.2	0.334548	0.00933706	-5.1631	1.21354e-166	5.35039e-166
AC091435.2	0.0736002	0.927941	3.65625	3.6611e-234	3.27546e-233
AC011462.4	0.0134917	1.59945	6.88936	0	0
AC093525.3	0.399611	0.0339308	-3.55793	8.24889e-105	2.10895e-104
LINC00384	0.0329312	0.00401634	-3.0355	5.27604e-64	9.74773e-64
AP005530.1	0.499365	0.0490748	-3.34704	3.04464e-95	7.19372e-95
AL590560.3	0.0191982	1.1162	5.86149	0	0
AC106782.5	0.0528982	1.10416	4.38359	0	0
AC015726.2	0.0214131	0.660527	4.94705	2.30638e-273	4.30749e-272
AC011773.1	0.0178063	0.171811	3.27037	2.23688e-176	1.05491e-175
AC004543.1	0.00816245	0.0640092	2.97121	1.70508e-104	4.34665e-104
AC087521.2	0.303973	0.0427769	-2.82904	2.18995e-25	2.91483e-25
AC092535.4	1.02208	0.0243228	-5.39306	2.14489e-242	2.14519e-241
CU633904.1	1.44281	0.00177225	-9.66908	6.61578e-290	2.77272e-288
AC098848.1	0.00417562	0.0729452	4.12675	2.23751e-131	7.23338e-131
AC025211.1	0.0458126	1.15071	4.65063	6.02357e-264	8.7628e-263
AC011465.1	0.0140696	0.0743083	2.40094	4.51151e-78	9.3291e-78
AL360181.4	0.0499531	0.218572	2.12946	1.32481e-116	3.76736e-116
AL078581.2	0.00145553	1.08702	9.54462	0	0
AC008522.1	0.361792	0.0872039	-2.0527	3.64697e-63	6.67837e-63
AC008736.2	1.3195	0.101712	-3.69743	4.8618e-278	1.07987e-276
MCM8-AS1	0.00520256	0.0398679	2.93793	1.29908e-162	5.49027e-162
AC079834.1	0.00189858	0.603917	8.31329	0	0
EHD4-AS1	0.0102768	0.105553	3.3605	2.39798e-172	1.09709e-171
AC004066.1	0.00220627	0.127292	5.85039	6.1543e-112	1.67436e-111
AC009093.2	0.473085	0.0680311	-2.79783	1.0626e-201	6.54e-201
AL513327.2	0.0113527	0.171644	3.91832	9.4791e-215	6.83836e-214
AC073263.2	0.0162417	0.067414	2.05335	4.04615e-121	1.19954e-120
AL080316.1	0.0587549	0.99811	4.08642	1.24018e-281	3.56413e-280
HOXA11-AS	0.0186274	0.286897	3.94504	1.78806e-84	3.89535e-84
AL137847.2	0.0241235	0.37969	3.97631	4.10894e-236	3.78184e-235
OCIAD1-AS1	0.127468	1.37141	3.42746	2.75962e-283	8.9956e-282
AC098850.1	0.337774	0.0441827	-2.9345	1.8623e-108	4.92394e-108
AC091057.3	2.14531	0.131766	-4.02513	2.88008e-279	6.75954e-278
AC136443.3	0.369053	0.028047	-3.71791	4.61617e-195	2.60228e-194
AC093752.1	3.30715	0.0746671	-5.46897	1.67883e-281	4.7857e-280
FOXP1-IT1	0.0269992	0.00618851	-2.12525	6.31794e-16	7.6963e-16
CU639417.4	0.244656	0.0319165	-2.93838	1.15202e-117	3.32161e-117
AC108727.1	0.0557857	0.233391	2.06478	4.14364e-137	1.39595e-136
AL353764.1	0.0789254	0.328359	2.05671	4.19546e-140	1.4509e-139
AL445250.1	0.0550155	1.15635	4.3936	9.62472e-271	1.62124e-269
AC079915.1	0.0310824	0.00707994	-2.13429	2.21674e-10	2.54659e-10
DIP2A-IT1	0.0176366	0.0802281	2.18554	2.79758e-111	7.56732e-111
LINC00994	0.0179217	0.14457	3.01199	3.44604e-119	1.0072e-118
AC093895.1	0.00879386	0.231801	4.72025	4.00722e-79	8.35252e-79
LINC00609	0.317304	1.54877	2.28718	4.3207e-181	2.13039e-180
AC110048.2	0.104955	0.00710447	-3.8849	6.74134e-155	2.64876e-154
AL354919.1	0.0453255	0.00900324	-2.33181	2.40715e-38	3.59464e-38
ARHGAP31-AS1	0.136926	1.42063	3.37507	1.00051e-277	2.15431e-276
FAM242A	0.0202365	0.232146	3.52	1.83505e-71	3.59106e-71
DSCAM-IT1	0.00975141	0.0578985	2.56984	6.1119e-96	1.45042e-95
AC107419.1	0.0139316	0.10741	2.9467	3.18287e-84	6.91899e-84
AC092070.3	0.0482755	0.295237	2.61251	3.83954e-168	1.70994e-167
AL390726.2	0.996187	0.0226173	-5.46092	5.39294e-165	2.33528e-164
AC010230.1	0.00977705	0.0788139	3.01098	6.94222e-151	2.62797e-150
LINC02100	0.00522396	0.378152	6.17768	1.43657e-140	4.9827e-140
LINC02058	0.0897005	0.980725	3.45066	2.87203e-151	1.09308e-150
AL136084.2	0.390241	0.0849655	-2.19942	1.12409e-27	1.52971e-27
AL591686.2	0.186509	1.62164	3.12014	8.67946e-201	5.24567e-200
AC011008.1	0.174192	0.749553	2.10535	1.23649e-178	5.95901e-178
LINC01117	0.0371614	0.631672	4.0873	2.10049e-219	1.61458e-218
AC015849.1	0.873654	0.168333	-2.37574	3.12919e-172	1.43069e-171
AC139491.1	1.24801	0.258808	-2.26968	2.31184e-190	1.24067e-189
LINC01616	1.1375	0.281624	-2.01403	1.0427e-94	2.45295e-94
LINC01690	0.0473265	0.307633	2.70049	5.69981e-165	2.46362e-164
AL136982.6	0.0600391	0.00515694	-3.54132	2.94316e-47	4.75621e-47
AC126407.1	0.111837	1.54049	3.78392	1.96875e-253	2.33367e-252
AC007368.1	0.196107	0.0391853	-2.32326	2.39525e-32	3.39677e-32
AL355803.1	0.0602428	0.311012	2.36811	1.04168e-154	4.08152e-154
AC011005.4	0.147086	0.68602	2.22159	1.41233e-182	7.07771e-182
ADAMTS9-AS1	0.501805	0.0768929	-2.7062	1.27197e-124	3.86866e-124
PCAT4	0.00583273	0.0399296	2.77522	4.74881e-110	1.27183e-109
AC126768.2	0.105754	0.00225122	-5.55386	6.86186e-142	2.41451e-141
AC026471.5	0.554482	0.0955823	-2.53632	1.69981e-147	6.25633e-147
LINC00698	0.0555922	0.409541	2.88105	1.5369e-86	3.39438e-86
AC079313.1	0.00818942	0.112647	3.7819	5.85342e-189	3.09182e-188
AC116914.2	0.197897	1.33126	2.74997	2.49773e-267	3.92555e-266
STARD13-AS	0.166164	0.0257514	-2.68988	1.08938e-29	1.50931e-29
AC004233.2	0.0222216	1.63629	6.20232	2.26838e-296	1.20997e-294
CASC6	0.0224905	0.209006	3.21615	9.93622e-192	5.4402e-191
AC011824.1	0.22586	0.0166284	-3.76371	5.07227e-94	1.18454e-93
AC007950.1	2.79217	0.106591	-4.71123	2.15686e-281	6.12358e-280
DDN-AS1	1.24777	0.2357	-2.40433	2.50785e-113	6.92461e-113
LINC02519	0.294506	0.0632556	-2.21903	4.39287e-149	1.64173e-148
ZNF114-AS1	0.0536405	0.255487	2.25186	6.12561e-101	1.51761e-100
AC007744.1	1.8528	0.000844666	-11.099	2.22877e-298	1.35283e-296
ARMCX3-AS1	0.511312	0.0695982	-2.87708	2.3079e-112	6.30819e-112
CLCA4-AS1	0.118727	0.850691	2.84099	6.54306e-278	1.43519e-276
AC006299.1	0.150539	0.0373351	-2.01153	1.40558e-63	2.58331e-63
AC010260.1	0.0778322	0.366653	2.23597	2.69936e-158	1.0942e-157
AC139530.1	0.253639	2.11141	3.05736	1.32449e-282	4.09023e-281
AC090587.1	0.178232	0.784686	2.13836	1.66699e-200	1.00318e-199
AC097713.1	0.0833013	0.414594	2.31529	3.27227e-69	6.27452e-69
AC114760.2	0.0191217	0.0922689	2.27063	7.12816e-122	2.12307e-121
AC010280.2	0.0307568	0.208665	2.76221	3.50226e-167	1.55091e-166
AL139393.2	1.32884	0.00276057	-8.91098	1.43325e-299	9.25827e-298
AL354726.1	0.033983	0.159678	2.23228	4.35803e-117	1.24837e-116
LINC00345	0.00222474	0.176557	6.31035	8.2099e-177	3.8848e-176
AC004485.1	0.0184391	0.518154	4.81254	6.80148e-258	8.80316e-257
AL161457.2	1.13216	0.194311	-2.54264	1.44747e-278	3.26656e-277
AC233701.1	0.108728	0.000735439	-7.2079	4.47651e-125	1.36861e-124
AL357033.1	0.051718	0.0105296	-2.29622	7.6641e-68	1.45688e-67
AC107464.2	0.0187548	1.27852	6.09107	0	0
AL133304.1	0.015637	0.0934674	2.57949	5.44886e-98	1.31164e-97
AC087289.1	3.70573	0.269601	-3.78086	1.02064e-279	2.57575e-278
AC107032.2	0.149223	1.13891	2.93211	7.433e-273	1.35937e-271
TGFB2-AS1	0.446444	1.99399	2.1591	5.15657e-211	3.51475e-210
AL583722.2	3.38484	0.0712878	-5.56929	1.12328e-281	3.25473e-280
AC008269.2	0.10159	0.0217087	-2.22642	3.72808e-71	7.26527e-71
AC087071.2	0.00259732	0.498605	7.58473	0	0
AC008750.1	0.126432	0.735372	2.54011	2.09654e-188	1.09753e-187
AC007391.1	0.0180559	0.0950724	2.39655	1.61436e-127	5.03843e-127
AC092747.1	0.0142109	0.087568	2.62341	9.91493e-105	2.53305e-104
AC063979.1	0.00121556	0.182603	7.23095	0	0
LINC02285	0.0531222	0.597503	3.49156	3.42485e-233	3.03326e-232
AC064805.1	0.117271	0.0214849	-2.44846	0.00156777	0.00165721
AL009181.1	0.446759	0.0363496	-3.61949	1.38554e-127	4.33005e-127
AP001120.2	1.544	0.0407991	-5.24199	2.17893e-197	1.26687e-196
AC239804.1	2.04965	0.0232687	-6.46084	4.74746e-284	1.60706e-282
AL353608.2	0.375733	0.026087	-3.84831	3.16137e-114	8.8225e-114
AC020763.1	0.012278	0.0840055	2.77441	2.62953e-134	8.67596e-134
AC048382.4	0.0538062	0.0053608	-3.32725	2.47579e-88	5.55692e-88
AC007218.1	0.126137	0.0143759	-3.13326	1.68515e-60	3.02451e-60
AC021086.1	0.0138609	0.0651371	2.23246	5.69313e-159	2.32244e-158
AC005208.1	0.00324222	0.0466435	3.84662	1.72153e-128	5.42096e-128
AC122707.1	0.286948	1.22269	2.0912	6.21268e-121	1.83796e-120
AC010335.1	0.0147234	0.0728249	2.30632	4.70615e-169	2.11058e-168
ST6GAL2-IT1	0.0357419	0.483234	3.75703	3.23859e-207	2.1351e-206
AP001972.3	1.21919	0.204843	-2.57333	4.55209e-148	1.68691e-147
NBAT1	0.173409	0.69406	2.00088	2.15469e-165	9.38809e-165
AC104564.1	0.0531224	0.294959	2.47312	5.62905e-165	2.43603e-164
LINC01840	0.040442	0.205691	2.34656	2.01739e-93	4.69257e-93
AL390728.5	0.0127644	2.53057	7.63119	0	0
AC004466.1	2.07882	0.247119	-3.07248	9.79837e-280	2.48167e-278
AC007376.2	0.052838	0.723735	3.77581	7.14174e-271	1.20877e-269
AC023154.1	0.181821	0.0338802	-2.424	2.40083e-56	4.14524e-56
AC133528.1	0.909387	0.122361	-2.89375	1.21134e-229	1.03886e-228
AL031280.1	0.0836027	0.0160772	-2.37853	1.83477e-81	3.89702e-81
AC002116.1	1.17867	0.000526727	-11.1278	5.59172e-280	1.43691e-278
AC093423.2	0.00130967	0.728905	9.12038	0	0
AC100858.2	0.000981985	0.0444272	5.4996	1.79813e-179	8.71946e-179
AL390038.1	0.0550632	0.000581794	-6.56444	5.02395e-128	1.57636e-127
AC009065.3	0.299272	0.0580805	-2.36533	4.08728e-94	9.56097e-94
AC062037.2	7.00096e-05	0.58853	13.0373	1.04536e-214	7.53363e-214
AC044840.1	0.0101895	0.0627838	2.62331	4.47343e-98	1.07831e-97
AC020913.3	7.00096e-05	0.373812	12.3825	1.14845e-210	7.79018e-210
STEAP2-AS1	0.0810818	0.019005	-2.093	3.77122e-46	6.03069e-46
LINC02308	0.171689	0.990283	2.52804	4.59012e-148	1.70011e-147
AL355601.1	0.0194535	0.139366	2.84078	5.01277e-72	9.85891e-72
BX293535.1	0.285461	1.59779	2.48471	2.08961e-241	2.04916e-240
KLHL30-AS1	0.132073	0.0239385	-2.46393	2.3016e-128	7.23787e-128
AC069061.2	0.198105	0.0128159	-3.95026	1.64848e-88	3.70474e-88
AP002518.2	0.0111256	0.0656438	2.56077	7.27125e-88	1.62478e-87
LINC02008	0.00757875	0.132624	4.12924	5.86915e-220	4.54617e-219
AC012462.3	0.00185852	0.348059	7.54904	1.88116e-183	9.48799e-183
AC124319.2	0.0666577	0.866717	3.70072	1.71505e-285	6.2894e-284
AP001999.1	0.323812	0.000412454	-9.61671	9.92103e-275	1.92967e-273
SYNE1-AS1	0.0483951	0.247874	2.35667	1.25038e-165	5.46489e-165
AC060814.3	0.0828922	0.000285642	-8.18089	8.6343e-238	8.08433e-237
AC007952.6	0.12043	0.0104344	-3.52877	1.88576e-139	6.49272e-139
AC108125.1	0.126563	0.0102193	-3.63049	1.46314e-71	2.86564e-71
AC092675.1	0.151805	1.0525	2.79353	5.93862e-221	4.66672e-220
AC025171.3	0.0185223	0.354765	4.25953	6.3632e-243	6.40963e-242
LINC00381	0.0134597	0.107274	2.99458	2.00214e-162	8.45147e-162
SLX1B-SULT1A4	2.036	0.00241549	-9.71921	2.91101e-288	1.16457e-286
AC020659.1	0.864609	0.0169547	-5.67229	1.84727e-196	1.06003e-195
AL645608.6	0.0732868	1.55548	4.40766	3.86377e-261	5.27225e-260
AC136944.2	0.0541098	0.00102708	-5.71926	3.1112e-223	2.48931e-222
AL353801.1	0.0255318	0.161397	2.66024	4.13104e-139	1.41679e-138
AL035446.1	0.245125	1.46409	2.57842	4.32983e-139	1.48424e-138
LINC01841	0.0187533	0.127515	2.76545	7.18185e-126	2.20915e-125
AL662791.1	0.0914	0.946601	3.37249	2.40654e-261	3.29658e-260
AC007383.1	0.000287042	2.86819	13.2866	0	0
AC023158.2	0.276651	0.052112	-2.40838	2.93284e-59	5.20155e-59
AC002091.1	0.0414098	0.708915	4.09757	4.6435e-267	7.20152e-266
NKX2-1-AS1	0.0847885	0.0204411	-2.0524	1.78444e-38	2.66869e-38
AL133304.2	0.0343773	0.528108	3.9413	1.12417e-242	1.12914e-241
AC004771.3	0.675524	0.0222429	-4.92459	8.91378e-273	1.61757e-271
AC010487.1	1.17074	0.260541	-2.16784	2.36034e-255	2.91564e-254
AC020922.3	0.436172	0.0890605	-2.29204	1.24194e-65	2.32196e-65
AL035696.3	0.0292419	0.146237	2.32221	1.5944e-22	2.06706e-22
ESRG	0.0305418	0.00230955	-3.7251	1.10653e-75	2.24915e-75
AL354793.1	0.0231287	0.339948	3.87756	6.55937e-194	3.68004e-193
AL049780.2	0.145533	0.658085	2.17693	4.31733e-200	2.57613e-199
AL080317.1	1.29027	0.254108	-2.34416	3.40229e-264	4.98036e-263
AC011524.1	0.00761817	0.224992	4.88429	3.60673e-117	1.03358e-116
AC092287.1	0.0136407	0.131656	3.27078	5.26507e-138	1.78743e-137
AL022323.4	0.0264142	0.00357302	-2.8861	4.5132e-50	7.44203e-50
AL355001.1	0.0143287	0.0685387	2.25801	3.29669e-102	8.23705e-102
AC027682.4	1.57519	0.381248	-2.04673	2.9965e-255	3.69499e-254
AC148477.4	0.361658	0.0462406	-2.96739	6.93507e-50	1.14195e-49
TEX41	0.221031	0.018473	-3.58076	8.15841e-116	2.30604e-115
AC016745.2	0.0846471	0.00698157	-3.59984	3.63667e-206	2.35781e-205
LINC01857	0.025547	0.154471	2.59611	1.66076e-72	3.28467e-72
AC134043.2	0.175518	0.0220212	-2.99466	1.72406e-212	1.2007e-211
AC233728.1	0.208576	1.07587	2.36685	8.102e-210	5.45374e-209
AC008543.3	0.0154199	0.0751779	2.28552	2.10436e-116	5.97692e-116
AC245033.2	0.00852825	0.133199	3.96519	3.67197e-184	1.86136e-183
CARNMT1-AS1	0.0201657	0.143565	2.83173	1.59825e-188	8.37923e-188
NFIA-AS2	0.521491	2.58289	2.30827	1.91207e-234	1.7172e-233
MIR194-2HG	0.0735378	0.0110145	-2.73908	2.86243e-70	5.5354e-70
CARMN	0.673074	0.0278461	-4.59522	4.0197e-277	8.44857e-276
AL138690.1	0.432337	0.0717817	-2.59047	1.65052e-197	9.61236e-197
AC087286.4	0.01123	0.0560652	2.31974	7.2008e-112	1.95605e-111
AC013472.1	0.0692778	0.486973	2.81338	4.72534e-184	2.39017e-183
LINC02193	2.011	0.098747	-4.34803	1.04791e-275	2.10524e-274
LINC02507	0.00491668	0.022172	2.17298	4.15525e-79	8.65851e-79
RPS6KA2-IT1	0.0325745	0.344706	3.40355	1.64683e-232	1.45123e-231
AC018462.1	0.0255622	0.1145	2.16327	3.19519e-179	1.54727e-178
AC022929.2	0.0465267	0.00437764	-3.40983	2.37089e-96	5.6454e-96
PABPC5-AS1	0.0414706	0.205655	2.31007	1.87338e-114	5.23431e-114
HCG24	0.343269	0.0292057	-3.55502	6.46568e-114	1.79798e-113
AJ011931.1	0.0966583	0.00543975	-4.15128	2.72019e-42	4.2048e-42
AC006449.3	0.00577262	0.0403336	2.80469	2.53991e-104	6.45847e-104
AC011510.1	0.0385761	0.191715	2.31318	1.32751e-128	4.18397e-128
AC091132.4	1.28544	0.10349	-3.6347	2.59172e-270	4.31402e-269
AC099329.1	0.339679	0.0207294	-4.03442	1.49105e-126	4.60257e-126
AC012065.2	0.1211	0.742052	2.61532	1.47795e-219	1.13854e-218
AC092143.2	1.44494	0.02769	-5.7055	7.37464e-278	1.60758e-276
AC008555.1	0.0392776	0.269511	2.77857	9.66374e-70	1.86073e-69
LINC01193	0.00639208	0.032627	2.35171	9.12349e-108	2.39339e-107
AC003986.3	0.00598156	0.179481	4.90716	6.4997e-114	1.80673e-113
AC036103.1	0.00828912	0.0861913	3.37825	1.97364e-209	1.3197e-208
AC083864.2	0.0215581	1.48136	6.10255	1.34845e-297	7.65678e-296
IL21-AS1	0.00396641	0.0407736	3.36173	1.78654e-72	3.53244e-72
JMJD1C-AS1	0.259746	1.05737	2.02531	2.93521e-209	1.95523e-208
AC008686.1	0.716698	0.0299338	-4.58152	5.5396e-117	1.58361e-116
LINC01189	0.0374126	0.000733933	-5.67173	2.94838e-90	6.72047e-90
AL035530.1	0.0204496	0.320377	3.96962	2.15338e-226	1.77125e-225
AC105339.2	0.900391	0.172741	-2.38194	3.81562e-275	7.5044e-274
LINC02588	0.140879	1.34345	3.25341	2.05568e-236	1.89699e-235
AC005703.2	0.000916457	0.2206	7.91115	1.63859e-274	3.1609e-273
AL589743.1	0.865324	0.000291019	-11.5379	3.6495e-289	1.5027e-287
AL391839.2	0.00294786	0.0683793	4.53582	1.81323e-143	6.44796e-143
AC010636.1	0.00787949	0.0585316	2.89304	3.68674e-69	7.06734e-69
AC215217.1	0.61718	0.00680441	-6.50308	5.68371e-125	1.73317e-124
AC012558.1	0.088276	1.10821	3.65007	8.23369e-236	7.55847e-235
AL645608.1	0.0897604	0.981324	3.45058	4.30503e-237	3.98315e-236
AP005432.1	0.0341753	0.00809869	-2.07719	1.66288e-29	2.29936e-29
AP006621.2	0.423377	1.92856	2.18751	3.75049e-243	3.80508e-242
CU638689.4	0.776469	0.0227737	-5.09149	2.14297e-272	3.83935e-271
AC108159.1	0.00777162	0.0454245	2.54718	3.87073e-82	8.2788e-82
AC025176.1	0.0152513	0.398701	4.7083	8.43706e-199	4.967e-198
AC009041.1	0.0477323	0.583297	3.61119	6.3401e-218	4.79491e-217
AP001021.1	0.020004	0.0876742	2.13187	3.83584e-196	2.18689e-195
LINC01387	0.00397106	0.130803	5.04173	3.9308e-122	1.17424e-121
AC110285.5	0.148678	0.633784	2.0918	2.58289e-148	9.58677e-148
AC005899.3	0.619663	0.103602	-2.58043	1.17106e-21	1.50822e-21
AC089998.1	0.113973	0.0164796	-2.78995	1.89853e-166	8.34949e-166
AC011978.1	0.00853551	0.429564	5.65325	0	0
AC135178.5	0.729557	0.113039	-2.6902	2.45626e-244	2.52843e-243
AL606489.1	0.0901657	0.496088	2.45994	5.7664e-144	2.0568e-143
AC018716.1	0.150471	0.0240112	-2.6477	6.05537e-38	9.01011e-38
LIMD1-AS1	1.37603	0.264505	-2.37915	6.37778e-278	1.40331e-276
AL590652.1	0.0752823	0.373296	2.30994	4.43365e-200	2.64329e-199
AL359962.1	0.120402	0.719486	2.57911	6.95598e-203	4.33809e-202
AC021218.1	0.0115215	0.143755	3.64122	8.49787e-73	1.68688e-72
SMIM10L2B-AS1	0.0745504	0.012731	-2.54987	1.21173e-43	1.89932e-43
MIR4307HG	0.00245148	0.0309864	3.65991	3.59893e-122	1.07601e-121
AC113346.1	0.0735083	0.324722	2.14323	8.65347e-54	1.46253e-53
AL110292.1	0.0173956	0.167778	3.26976	1.45661e-203	9.17354e-203
LINC02334	0.0358904	0.00739818	-2.27836	7.54607e-61	1.35818e-60
AL390955.2	0.23891	1.00723	2.07585	3.93203e-249	4.40851e-248
AL133465.1	0.331366	1.89896	2.51871	2.33749e-130	7.47425e-130
AC140725.1	0.669097	0.0663237	-3.33462	6.46548e-219	4.9482e-218
AC018552.3	0.00874016	0.0890798	3.34937	1.69412e-162	7.15557e-162
AC040168.1	0.0115833	0.939573	6.34189	0	0
CU639417.5	0.0753356	0.007292	-3.36894	1.42974e-57	2.49301e-57
AC107464.1	2.49492	0.0244711	-6.67177	1.51792e-285	5.62508e-284
LINC01106	3.58791	0.186714	-4.26425	1.77431e-275	3.52907e-274
AP002387.1	0.0377037	3.62923	6.58881	1.41805e-294	6.79219e-293
AC097059.1	0.0222071	0.146652	2.72331	8.53664e-126	2.62245e-125
AC027763.2	0.0238146	0.184399	2.95292	3.86326e-150	1.45695e-149
AL031722.1	0.0102094	2.06404	7.65943	0	0
AC079210.1	0.00316611	0.115427	5.18812	1.32055e-103	3.34101e-103
LINC01654	0.0338842	0.00648665	-2.38507	1.16408e-31	1.64058e-31
TRHDE-AS1	1.84834	0.229788	-3.00786	1.17202e-253	1.39867e-252
AC078850.2	0.00302428	0.094807	4.97033	6.43845e-139	2.20385e-138
AL359258.2	0.379402	2.03558e-05	-14.186	7.30634e-275	1.429e-273
LINC01666	0.014344	0.16792	3.54925	1.25195e-138	4.27289e-138
AC124861.1	0.00832116	0.115642	3.79673	1.48039e-123	4.46017e-123
AL512785.1	0.018386	0.763939	5.37678	3.22839e-205	2.07023e-204
AF230666.2	0.0725415	0.0159298	-2.18708	1.5587e-33	2.23246e-33
AC007881.2	0.0161487	0.163425	3.33914	2.41044e-142	8.50298e-142
AC092800.1	0.0112121	0.0462004	2.04284	6.99937e-82	1.49432e-81
AL031283.2	0.0207315	0.088733	2.09765	4.68454e-38	6.9748e-38
AC134312.5	0.347676	0.0843614	-2.04309	4.04148e-68	7.69498e-68
AC008750.6	0.000549019	0.0690002	6.9736	3.47206e-138	1.18043e-137
AC021546.1	0.033812	0.294313	3.12174	2.62697e-89	5.94933e-89
KCNMA1-AS1	0.139781	0.0171554	-3.02644	4.3851e-131	1.41436e-130
AC009087.1	0.0533144	0.364454	2.77314	5.48738e-212	3.79908e-211
LINC00658	0.237165	0.019581	-3.59837	2.40229e-148	8.92116e-148
AC244090.2	7.00096e-05	0.317347	12.1462	0	0
LINC02323	0.00959407	0.0431585	2.16943	2.16049e-113	5.97016e-113
AL592430.1	0.57701	0.0845362	-2.77095	1.88738e-201	1.15758e-200
DISC1-IT1	0.00822538	0.0380338	2.20913	1.84272e-93	4.2877e-93
AC019068.1	0.0132428	0.0610526	2.20485	9.12927e-122	2.71679e-121
LINC02450	0.0304792	0.214294	2.81369	8.9085e-71	1.72938e-70
AC044839.1	1.53749	0.00443042	-8.43892	5.54688e-286	2.07742e-284
LINC00396	0.00273415	0.146146	5.74017	3.6567e-191	1.98971e-190
AC010731.1	0.00212234	0.408426	7.58828	1.05549e-271	1.82597e-270
C11orf72	0.18724	0.0450544	-2.05515	7.30943e-197	4.22196e-196
AC067969.2	0.00994788	0.0518655	2.38232	1.76786e-85	3.87894e-85
U62317.2	3.61667	0.592221	-2.61045	1.46697e-279	3.64979e-278
Z97652.1	0.017529	0.0893519	2.34975	1.84655e-99	4.50504e-99
AC100774.1	0.182163	0.0277633	-2.71398	4.90005e-131	1.57901e-130
AP003465.1	0.179281	0.78206	2.12506	8.92041e-211	6.06846e-210
AL157414.1	0.00060656	0.0270912	5.48103	1.53599e-123	4.6257e-123
AC012146.2	0.00136613	0.424694	8.28018	0	0
AC021739.4	0.0260871	1.82909	6.13165	0	0
AC060766.6	0.0503997	0.54183	3.42635	4.00003e-254	4.8144e-253
WASIR2	1.00165	0.150042	-2.73894	1.00591e-215	7.3547e-215
AC104561.3	0.0275842	0.307224	3.47737	3.03414e-246	3.24179e-245
AC124784.1	0.0101394	0.041133	2.02032	1.02076e-67	1.9362e-67
AC005381.1	0.138498	0.00976142	-3.82663	1.22248e-81	2.60044e-81
AC015853.2	0.0212539	0.117948	2.47235	4.72698e-85	1.03491e-84
AC093734.1	0.00350676	0.28668	6.35316	4.28478e-243	4.33464e-242
ADD3-AS1	1.29468	0.234407	-2.46551	2.42266e-272	4.31848e-271
HTT-AS	0.0101459	0.066531	2.71313	1.87979e-113	5.19859e-113
DIO3OS	1.95567	0.321671	-2.604	6.01178e-244	6.14354e-243
AL021937.4	0.0423445	0.32441	2.93757	6.46511e-203	4.03554e-202
AC092112.1	0.0387978	0.661884	4.09253	8.63873e-241	8.36662e-240
AC010976.1	1.18795	0.224129	-2.40608	3.07134e-267	4.79496e-266
AC040174.1	0.129727	0.0108202	-3.58368	8.84725e-138	2.9992e-137
AC020928.2	0.950429	0.0580428	-4.03339	8.17925e-278	1.77747e-276
AL139021.2	0.0306621	0.204884	2.74028	1.46696e-178	7.06491e-178
LINC02188	0.124063	0.0156562	-2.98627	3.47692e-206	2.2584e-205
AC004112.1	0.0155138	0.578917	5.22173	0	0
AC009041.3	0.00558716	0.522165	6.54625	0	0
AC239868.1	1.70478	0.00785162	-7.76238	4.52305e-290	1.91848e-288
AC004160.1	0.190704	0.0414352	-2.20241	3.02781e-82	6.47989e-82
LINC00928	0.143993	1.31283	3.18861	1.21972e-224	9.88264e-224
AC090236.2	0.0641955	0.0143398	-2.16244	9.96116e-25	1.31786e-24
AC087620.1	0.00816936	0.0762086	3.22166	6.14054e-129	1.94404e-128
AC126763.1	0.090358	0.0123787	-2.8678	8.62893e-139	2.95077e-138
AC005342.2	0.0268854	0.117359	2.12603	4.92001e-87	1.09246e-86
BACH1-IT1	0.0549565	0.359926	2.71134	9.8996e-239	9.35612e-238
AC060766.3	0.00654113	0.716692	6.77567	0	0
POLH-AS1	0.14322	0.830108	2.53507	5.15709e-274	9.76104e-273
AC107959.3	0.00702882	0.0596172	3.08438	1.02665e-108	2.72062e-108
AL356414.1	0.00848	0.103929	3.61539	1.1657e-140	4.0452e-140
AC108156.1	0.0821706	0.603944	2.87772	3.07016e-163	1.3038e-162
AC239585.1	0.0561961	0.000351632	-7.32026	3.6384e-183	1.83378e-182
SH3TC2-DT	0.351308	0.0505176	-2.79788	7.88615e-74	1.58105e-73
AC010468.1	0.139488	0.00247583	-5.81608	2.60678e-198	1.52825e-197
AC067930.2	0.102054	0.467475	2.19555	2.01619e-173	9.29058e-173
AL355297.2	0.0337483	1.14378	5.08286	0	0
AC012087.2	0.0798592	0.00159387	-5.64685	4.05105e-92	9.34277e-92
AL590399.1	0.769352	0.0174679	-5.46086	1.38318e-281	3.95894e-280
NAGPA-AS1	0.731286	0.101035	-2.85557	1.38962e-247	1.50296e-246
LINC02211	0.00191603	0.0212393	3.47055	1.90352e-101	4.73258e-101
LINC02585	0.0786435	1.44859	4.20318	0	0
Z95114.1	0.000925047	0.00501129	2.43758	1.837e-270	3.065e-269
AC008736.1	0.372157	1.78142	2.25905	5.03188e-265	7.52219e-264
TCF7L1-IT1	0.00621871	0.0507707	3.02931	9.08948e-94	2.11777e-93
AC027698.1	0.00572719	0.0701015	3.61355	2.25217e-165	9.80677e-165
HIF1A-AS1	0.222469	1.13184	2.347	1.22555e-245	1.29761e-244
AL359541.1	0.0822586	0.516075	2.64934	1.12079e-212	7.83665e-212
AC005746.2	0.0197446	0.629743	4.99523	2.33004e-285	8.45662e-284
AL512283.1	0.0719036	0.00410189	-4.1317	1.62561e-130	5.20743e-130
AC004264.1	0.0393388	0.178879	2.18496	1.13651e-83	2.46146e-83
AC078909.1	1.40092	0.236875	-2.56417	4.58912e-232	4.01891e-231
AF067845.2	0.0400025	0.00245649	-4.02542	8.23484e-94	1.91992e-93
LINC02125	0.0398938	0.0025124	-3.98902	1.11902e-100	2.76554e-100
AC011446.1	0.640479	0.152614	-2.06926	7.08469e-39	1.06293e-38
AC007952.2	0.31302	0.010724	-4.86734	2.53034e-265	3.83143e-264
BNC2-AS1	0.0440158	0.464777	3.40045	3.98207e-153	1.54054e-152
AGBL5-IT1	0.505659	2.06285	2.0284	1.13011e-275	2.26054e-274
AC079907.2	0.111005	0.021406	-2.37453	2.64472e-97	6.34031e-97
HCG14	0.102335	0.43344	2.08254	1.97979e-153	7.68452e-153
CERS6-AS1	3.41424	0.00817469	-8.70618	6.86402e-282	2.00539e-280
AC103564.1	0.513684	0.097965	-2.39054	1.62208e-153	6.29954e-153
AC007952.1	0.124942	0.000397416	-8.29639	7.59745e-244	7.7527e-243
AC008696.2	0.000849199	0.0594634	6.12976	4.15418e-124	1.25535e-123
AC023855.1	0.00295963	0.0726224	4.61692	1.64223e-144	5.8725e-144
AL049712.1	0.0671602	0.341492	2.34617	4.05185e-172	1.85133e-171
LINC00336	0.11063	0.0197726	-2.48417	2.55251e-112	6.97137e-112
AC018845.1	0.00792364	0.10548	3.73466	2.87145e-134	9.45646e-134
AC073957.1	0.0769951	0.334806	2.12049	2.78369e-134	9.18032e-134
AL022238.2	0.0258983	0.315203	3.60535	2.40892e-250	2.74898e-249
AC022558.1	0.0438112	0.285443	2.70383	7.04386e-190	3.76296e-189
AC092683.1	4.17748	0.0744091	-5.81101	3.47237e-280	9.1349e-279
AC008982.2	0.0734016	0.505986	2.78521	5.83058e-216	4.28082e-215
MIR3945HG	0.0214914	0.0943114	2.13367	4.70361e-68	8.95326e-68
LINC02198	0.0492321	0.287659	2.54669	1.80506e-137	6.09858e-137
LINC02409	0.0145859	0.0869071	2.5749	5.89003e-71	1.14499e-70
SLX1A-SULT1A3	2.91991	0.0308337	-6.56527	7.94713e-282	2.31222e-280
FOXD3-AS1	0.0810277	1.46542	4.17675	7.53709e-201	4.56308e-200
AC126335.1	0.114132	0.00110385	-6.69203	2.50133e-119	7.31998e-119
AC100821.2	0.036503	0.207865	2.50956	8.76885e-174	4.05128e-173
AP000753.1	0.0057949	0.0388929	2.74665	2.31524e-93	5.38007e-93
AC118755.1	0.0567544	0.251765	2.14927	7.899e-107	2.0538e-106
AL049552.1	0.184445	0.930548	2.33489	2.21562e-212	1.54e-211
AL357054.2	0.0563708	0.286067	2.34334	4.71735e-159	1.9255e-158
FAM106A	2.38704	0.208579	-3.51656	4.46742e-269	7.24771e-268
AL137191.1	0.0118431	0.0984321	3.05508	1.03767e-140	3.60446e-140
AC093702.1	0.0244795	0.245592	3.32662	6.2198e-105	1.59365e-104
AC011524.2	0.00767162	0.13633	4.15142	4.70709e-99	1.14561e-98
AC011468.2	0.483195	0.0524841	-3.20265	1.21414e-86	2.68744e-86
AC078880.5	0.00415854	0.135971	5.03108	1.86329e-123	5.60659e-123
AL356124.1	0.0275331	0.175378	2.67123	3.45401e-125	1.05692e-124
LINC01412	0.0478033	0.229665	2.26435	4.63364e-124	1.39963e-123
AP000790.1	0.0568492	0.0104265	-2.44688	2.79289e-51	4.63353e-51
FAM223B	0.312522	0.00124644	-7.97	8.80078e-293	4.02379e-291
AC008278.2	0.0171743	0.120119	2.80614	6.94454e-110	1.85636e-109
AC096677.1	0.196169	0.866415	2.14296	1.00393e-196	5.78923e-196
AC005410.2	0.102922	0.414838	2.011	3.03661e-196	1.73545e-195
STK32A-AS1	0.147353	1.32056	3.16381	7.92355e-255	9.66892e-254
LCMT1-AS2	0.0855254	0.01255	-2.76866	2.40979e-182	1.20506e-181
LINC01726	0.00452866	0.147289	5.02343	1.28841e-211	8.89384e-211
LINC01842	0.0871974	0.407438	2.22423	3.35898e-26	4.50573e-26
AC009227.1	0.0760121	0.85976	3.49963	2.80119e-144	1.00016e-143
AC067945.2	0.00439623	0.109025	4.63225	6.92968e-166	3.03432e-165
AC084864.1	7.00096e-05	0.566179	12.9814	1.78317e-230	1.54053e-229
BX005266.2	0.890264	0.122619	-2.86005	8.77103e-210	5.89845e-209
AC005083.1	0.0425865	0.280847	2.72132	1.69998e-95	4.02202e-95
LINC01669	0.145427	0.000607266	-7.90375	7.06127e-112	1.91889e-111
AC105384.1	0.0157831	0.0737096	2.22347	7.30039e-53	1.22561e-52
AL355922.4	0.011526	0.183698	3.99437	5.8405e-134	1.91626e-133
AC092756.1	0.0146742	0.0649203	2.14539	5.22822e-84	1.13442e-83
AL590723.1	0.0464675	0.238708	2.36095	6.90698e-175	3.22066e-174
AL390783.1	0.335394	0.0356439	-3.23413	4.40634e-141	1.53666e-140
AC079305.1	0.173317	1.10823	2.67677	6.42284e-270	1.05909e-268
AC119396.1	0.0218903	0.593294	4.76039	3.16464e-282	9.6044e-281
LMO7DN-IT1	0.0110245	0.173124	3.97303	4.82046e-94	1.12611e-93
LINC01496	0.0158776	0.112346	2.82289	9.87461e-99	2.39419e-98
LYPLAL1-AS1	0.0308884	0.125932	2.02751	2.19196e-42	3.39125e-42
AC116025.1	0.347986	0.055467	-2.64933	6.20372e-18	7.71466e-18
AC239799.1	0.414618	0.0625476	-2.72876	1.57036e-226	1.29623e-225
AC093835.1	0.0480138	0.202941	2.07954	6.67556e-142	2.35013e-141
LINC01614	0.0116972	0.301723	4.68899	2.14518e-99	5.23181e-99
AC096708.2	0.00971192	0.0524745	2.43379	7.48943e-111	2.01811e-110
LINC00290	0.481183	0.103841	-2.21221	9.50398e-89	2.14342e-88
AC068305.2	0.0440942	0.178079	2.01386	5.40623e-99	1.31396e-98
AC007610.1	0.0531732	0.268299	2.33507	5.15891e-165	2.23532e-164
AL359076.1	0.346242	1.44013	2.05635	3.92227e-273	7.22951e-272
EDNRB-AS1	0.0100676	0.246148	4.61174	8.17872e-262	1.12914e-260
AC005906.2	1.47935	0.199609	-2.88972	2.34741e-233	2.08425e-232
AP003774.2	0.00256753	0.228379	6.4749	0	0
AC008758.2	0.0184244	0.098513	2.41869	3.54153e-143	1.25685e-142
AC009102.1	0.0931473	0.0159877	-2.54255	2.48709e-119	7.28437e-119
AC007389.3	0.0174345	0.384266	4.46209	1.79709e-213	1.27297e-212
AL138828.1	0.10483	0.00694852	-3.9152	6.54632e-45	1.03439e-44
DTX2P1-UPK3BP1-PMS2P11	1.10936	0.272589	-2.02492	2.54184e-275	5.01319e-274
AC073342.1	0.432566	0.00345003	-6.97017	6.5165e-197	3.77015e-196
AC005162.1	0.0101171	0.0860186	3.08785	1.67994e-131	5.44088e-131
AC079145.1	0.151521	0.831294	2.45584	3.26788e-248	3.61211e-247
AC025048.4	0.0947922	0.478845	2.33672	5.97771e-226	4.90548e-225
AL049648.1	0.0210689	0.178765	3.08487	3.26713e-145	1.17607e-144
AL033527.2	0.0294327	0.229878	2.96537	3.82524e-153	1.48068e-152
AC021016.2	1.21417	0.118963	-3.35139	5.30875e-277	1.10262e-275
AC106017.1	0.0817466	0.00327616	-4.64108	8.51876e-126	2.6181e-125
AC145423.1	0.162657	0.808583	2.31357	4.49633e-203	2.81161e-202
LINC01993	0.0248196	0.132414	2.4155	3.2453e-30	4.52389e-30
AC019080.3	0.0842178	0.387442	2.20178	1.30534e-166	5.75152e-166
AC087386.1	0.0793475	0.00196021	-5.3391	4.1647e-94	9.73884e-94
AC008663.1	0.0489868	0.237381	2.27674	6.69649e-138	2.27119e-137
AC023825.2	0.00942746	0.0654829	2.79618	9.22828e-116	2.6053e-115
MAGI1-IT1	0.0629206	0.00723703	-3.12006	4.01169e-98	9.68003e-98
AC008883.2	0.00497231	0.0654118	3.71756	5.3259e-109	1.41295e-108
AC245041.2	0.152203	0.0166983	-3.18823	5.95986e-65	1.10897e-64
AC011625.1	0.0160858	0.360108	4.48457	1.93305e-221	1.52928e-220
AL390755.1	0.0933613	3.74049	5.32426	4.2683e-284	1.45184e-282
AC019131.1	0.00973772	0.109652	3.4932	7.43725e-200	4.4116e-199
AC138932.4	7.00096e-05	0.735688	13.3593	0	0
LINC01248	0.0119524	0.0662907	2.47151	3.66657e-75	7.41635e-75
ANKRD44-IT1	0.0142445	0.0589005	2.04787	6.87767e-117	1.96214e-116
AP003559.1	0.608807	0.118195	-2.36482	4.12209e-170	1.86049e-169
AL158835.2	0.135869	0.741861	2.44893	4.01101e-196	2.28306e-195
AC018553.1	0.0850137	0.345282	2.02201	7.90651e-114	2.19605e-113
AC091982.1	0.0585385	0.694189	3.56787	2.19439e-265	3.33709e-264
FP565260.5	0.106212	0.0160529	-2.72603	1.20746e-52	2.02182e-52
AC026316.2	0.0511292	0.5188	3.34296	5.7942e-196	3.29008e-195
HCG15	0.0757135	0.850072	3.48896	1.2901e-270	2.16792e-269
AC009716.1	0.0271197	0.301601	3.47523	7.52199e-220	5.82004e-219
AL355916.2	0.568249	2.483	2.12749	9.88128e-159	4.02162e-158
LINC01545	0.0895551	0.385079	2.10431	1.96978e-165	8.58774e-165
AL359504.1	0.0550674	1.55924	4.8235	2.61402e-305	2.62933e-303
BCRP3	2.45462	0.535039	-2.19778	1.30712e-269	2.14532e-268
FAM157C	1.20671	0.0717424	-4.07211	1.40631e-267	2.22015e-266
LINC01484	0.213172	0.0352522	-2.59623	9.48999e-83	2.04277e-82
AL450306.1	2.13597	0.305118	-2.80745	2.66355e-272	4.73587e-271
AP001442.1	0.0895429	0.0114306	-2.96968	4.88123e-22	6.30388e-22
FAM215B	1.08047	0.0544016	-4.31187	3.64029e-281	1.00911e-279
LINC02280	0.0608312	0.00537961	-3.49924	2.25815e-103	5.69267e-103
AC015722.2	0.501183	0.0943889	-2.40865	3.42178e-76	6.98138e-76
AL391056.1	0.225586	0.0549688	-2.03699	2.47502e-143	8.79687e-143
AC006148.2	0.00942927	0.0523797	2.47379	9.54534e-85	2.08464e-84
PABPC4-AS1	0.0396913	0.260703	2.71551	1.4369e-172	6.58673e-172
AL359182.1	0.10501	0.739775	2.81656	4.44043e-206	2.87363e-205
FAM41C	0.519592	0.016525	-4.97465	5.66396e-217	4.21118e-216
AC093525.7	0.785577	0.0427467	-4.19987	1.39484e-280	3.76287e-279
AL392046.1	0.112127	0.0256658	-2.12722	1.64772e-30	2.30236e-30
AC083864.1	0.00897667	0.0370062	2.04351	1.60876e-67	3.04578e-67
AC138305.1	0.267712	0.0301187	-3.15195	7.10054e-86	1.56136e-85
AL359220.1	0.355383	0.0495858	-2.84137	2.26867e-169	1.02003e-168
AC013451.1	0.0118263	0.132045	3.48096	1.27659e-69	2.45452e-69
AC009034.1	1.15735	0.0507901	-4.51013	1.01385e-190	5.47433e-190
AC109454.3	0.175434	0.0421319	-2.05794	7.31247e-40	1.10725e-39
AC099668.1	0.32941	0.0590812	-2.47911	5.62654e-67	1.06182e-66
LINC00930	0.425613	0.0758573	-2.48818	4.92196e-197	2.84996e-196
LINC01099	0.123123	0.0296893	-2.05209	0.00518802	0.00543503
AP001029.2	0.922601	0.212399	-2.11893	1.51567e-237	1.41349e-236
ITPK1-AS1	0.0410929	0.00459876	-3.15957	2.21274e-93	5.14527e-93
ERC2-IT1	0.034716	0.00472072	-2.87852	4.52869e-36	6.62233e-36
AC026254.2	0.0553878	1.04602	4.2392	3.12954e-297	1.73505e-295
AC114488.2	0.63661	0.151293	-2.07306	7.4268e-218	5.60473e-217
AL160191.1	0.0520373	0.224473	2.10892	3.09382e-117	8.87315e-117
AL162574.1	0.359085	0.0884129	-2.022	4.48304e-72	8.822e-72
AC007114.2	0.0679675	0.00938181	-2.85691	1.86054e-181	9.24493e-181
AL049870.3	0.0594921	0.264246	2.15111	6.28924e-160	2.58358e-159
AL161669.3	0.191725	0.0456317	-2.07093	1.44223e-103	3.64622e-103
AC026368.1	0.512338	0.118646	-2.11043	3.34265e-94	7.82955e-94
AC133565.1	0.12518	0.0252178	-2.31149	1.89223e-37	2.80134e-37
JAKMIP2-AS1	0.0644306	0.319913	2.31186	1.79606e-131	5.81162e-131
AC130352.1	1.09839	0.0806951	-3.76676	7.57691e-273	1.3821e-271
UBXN7-AS1	0.0432224	0.378087	3.12887	5.03218e-218	3.80985e-217
LINC02598	0.0105227	0.67279	5.99858	5.51454e-259	7.23052e-258
AL355581.1	0.19318	0.0147506	-3.7111	5.18908e-121	1.53643e-120
AC004895.1	0.0338488	0.216133	2.67474	2.40922e-211	1.65657e-210
AC138819.1	0.193312	0.0469301	-2.04235	8.72676e-29	1.19869e-28
LINC02275	0.0356596	0.00543497	-2.71395	1.37703e-73	2.75289e-73
LINC02139	0.519909	0.0788232	-2.72157	5.29197e-166	2.31865e-165
AC093752.2	0.159939	0.884087	2.46667	1.6963e-237	1.57776e-236
AC106772.1	0.0243835	0.0993944	2.02726	8.9782e-102	2.23772e-101
LINC02294	0.00121705	0.38767	8.31529	5.45846e-276	1.1044e-274
AC092131.1	0.0313966	1.0568	5.07295	8.24884e-252	9.56838e-251
AC016026.1	3.63906	0.0231187	-7.29836	1.99779e-282	6.14256e-281
AC005006.1	0.000995005	0.117495	6.88368	1.4692e-150	5.5497e-150
ZNF197-AS1	0.156764	1.07646	2.77963	2.62735e-277	5.57205e-276
AC025423.1	0.0146579	0.0967806	2.72304	1.0922e-79	2.28466e-79
AC005606.2	0.439626	0.00551643	-6.3164	3.94136e-84	8.56516e-84
OR2A1-AS1	1.02987	0.049306	-4.38455	3.39999e-270	5.63278e-269
AP000919.1	0.075927	0.0188066	-2.01337	1.87889e-57	3.27133e-57
CCDC144NL-AS1	0.437541	0.0518159	-3.07795	3.19252e-229	2.72467e-228
AC092924.1	0.00640855	0.0786545	3.61746	3.2562e-139	1.12003e-138
AC104793.1	0.109527	0.00722469	-3.92221	6.88569e-66	1.29114e-65
AL008729.2	4.73067	0.10764	-5.45775	3.44544e-281	9.58869e-280
AL591684.2	0.577228	0.138086	-2.06358	1.28458e-153	4.99158e-153
AP000569.1	0.0701815	0.384391	2.45341	4.09751e-139	1.40597e-138
LINC02513	0.0956977	0.402902	2.07387	3.39014e-45	5.37007e-45
AC009518.1	0.00496166	0.0423198	3.09244	1.76985e-108	4.68125e-108
AL022315.1	0.11375	0.537484	2.24036	4.02869e-155	1.58647e-154
AC123912.1	0.134919	0.764468	2.50236	3.1965e-181	1.58163e-180
AC011509.1	0.0702339	0.322211	2.19777	5.60679e-131	1.80592e-130
AC092969.1	0.423842	0.0911368	-2.21742	4.75798e-72	9.36043e-72
AC021613.1	0.0208094	0.503545	4.59681	3.98699e-200	2.38305e-199
FAM226B	1.94699	0.00227065	-9.74392	1.12316e-293	5.23721e-292
CACNA2D3-AS1	0.031403	0.00469256	-2.74246	3.80451e-37	5.62055e-37
LINC00184	0.198669	0.0361455	-2.45848	2.63258e-161	1.0981e-160
AC011377.1	0.00915361	0.12096	3.72404	5.06673e-150	1.90673e-149
BRWD1-AS1	0.0153692	0.137971	3.16624	6.37343e-190	3.40739e-189
AL158166.2	0.0815702	0.430689	2.40053	1.51028e-152	5.80451e-152
AL606970.4	0.0494743	0.342316	2.79058	7.35573e-53	1.23461e-52
AC073115.1	0.00606265	0.0956479	3.97971	3.54314e-105	9.1015e-105
AC067930.4	0.0267993	0.223003	3.0568	2.80682e-203	1.75826e-202
AC011365.1	0.089683	0.0169824	-2.4008	5.4882e-70	1.05899e-69
AC138969.2	0.923481	0.00096937	-9.89582	3.21192e-290	1.37897e-288
AC136469.1	0.0177578	0.081911	2.2056	1.26865e-116	3.61057e-116
AC100778.2	0.0965548	0.458559	2.24769	9.49665e-192	5.20762e-191
AC117383.1	0.00785145	0.0658365	3.06786	1.00169e-98	2.42701e-98
AL355987.4	1.28784	0.291138	-2.14518	9.93407e-255	1.21013e-253
AC004771.2	0.159394	1.43241	3.16778	8.46245e-272	1.46759e-270
AC090907.1	0.135811	0.91459	2.75152	2.42008e-267	3.81203e-266
AC008972.2	0.12923	0.739916	2.51743	1.85757e-234	1.67039e-233
AL161457.1	0.0741739	0.0166266	-2.15742	3.10929e-20	3.95814e-20
AL355472.3	2.22124	0.36139	-2.61974	3.35989e-239	3.18398e-238
PTCSC3	0.0224827	0.261927	3.54228	7.82455e-185	3.98644e-184
AC010761.2	0.613747	0.001795	-8.41752	4.27553e-296	2.19737e-294
AC016820.1	0.0308532	0.298417	3.27383	1.19732e-188	6.30069e-188
AC012150.1	0.0947816	0.442805	2.22399	7.40386e-132	2.40455e-131
LINC01606	0.0999316	0.0174163	-2.5205	5.75807e-42	8.86758e-42
OPA1-AS1	0.015463	0.12809	3.05027	7.44759e-159	3.03639e-158
AP000696.1	0.0902976	0.527435	2.54623	5.58189e-71	1.08569e-70
Z82217.1	0.0350001	0.00747729	-2.22677	4.18288e-40	6.35007e-40
LINC02133	0.0424729	0.00814626	-2.38233	1.49354e-19	1.89001e-19
AP001363.2	0.0334053	1.14833	5.10332	0	0
CU638689.5	0.435693	0.0272842	-3.99717	2.17881e-217	1.63029e-216
INHBA-AS1	1.22477	0.305911	-2.00132	3.87948e-149	1.45063e-148
LINC01123	2.23432	0.153215	-3.86621	9.34376e-252	1.08206e-250
AC005740.3	0.0498925	0.260545	2.38464	1.80621e-166	7.94844e-166
AC008632.1	0.00471062	0.0455436	3.27326	6.85051e-164	2.93218e-163
AC010894.1	0.00032496	1.34144	12.0112	0	0
AL355312.3	0.640058	0.0566366	-3.4984	1.44414e-247	1.55954e-246
AL024508.1	0.021861	0.705479	5.01217	0	0
AC020915.1	0.253757	1.09267	2.10634	7.92381e-264	1.14265e-262
AC243960.3	0.118928	0.718669	2.59524	1.4315e-191	7.82546e-191
HCG21	0.0125462	0.323267	4.6874	6.26111e-201	3.80038e-200
AC010186.1	0.014523	0.102963	2.82572	1.9907e-120	5.87448e-120
KCNMA1-AS3	0.00165084	0.0222985	3.75567	4.78927e-108	1.25967e-107
AC123786.1	0.0166076	0.151013	3.18476	3.00196e-114	8.38429e-114
AL357078.2	0.000126603	0.16271	10.3278	4.81643e-295	2.3882e-293
LINC00266-1	0.495	0.0963732	-2.36073	5.21049e-86	1.14719e-85
AL162431.1	0.0183234	1.00366	5.77544	0	0
AL161785.1	0.289764	1.72419	2.57297	2.20438e-241	2.1557e-240
COL18A1-AS1	0.0538437	0.00664145	-3.01921	8.6019e-91	1.96579e-90
LINC01221	0.000808818	0.0511459	5.98266	4.26527e-114	1.18844e-113
LINC01142	0.00443178	0.0484706	3.45115	2.23261e-163	9.49265e-163
AC004477.2	0.142878	1.21014	3.08232	2.02361e-263	2.88018e-262
AC087164.1	0.29224	0.0560588	-2.38214	3.62047e-201	2.21282e-200
AC008870.4	0.00920422	0.130791	3.82882	1.79467e-232	1.57953e-231
LINC01289	0.0522611	0.0110636	-2.23992	6.67295e-57	1.15725e-56
AC021188.1	0.433031	2.07587	2.26118	3.3679e-270	5.59277e-269
PRICKLE2-AS2	0.00378138	0.0842718	4.47806	2.92423e-135	9.71661e-135
AC007950.2	0.037737	0.197851	2.39036	1.07357e-193	6.01352e-193
AC037459.3	1.13788	0.0233138	-5.60902	1.00377e-285	3.73943e-284
AL078590.2	0.079554	0.767108	3.26942	1.93196e-231	1.6773e-230
AC139887.3	0.0650143	0.0161965	-2.00507	2.59606e-27	3.52261e-27
BX088651.2	0.042627	0.00321716	-3.72791	1.12504e-47	1.82394e-47
AC022424.1	0.963022	0.000647588	-10.5383	1.5606e-218	1.19049e-217
AC022098.3	0.0743407	0.427353	2.5232	7.73821e-187	4.00918e-186
AC009065.1	1.03617	0.197074	-2.39445	4.09409e-226	3.36365e-225
AL392023.1	0.00535272	0.113941	4.41187	5.49784e-127	1.70455e-126
AC074286.1	0.135708	0.966783	2.83268	5.67778e-98	1.36628e-97
BOK-AS1	0.124782	0.0254135	-2.29574	1.42939e-32	2.03197e-32
EWSAT1	0.503855	0.125224	-2.0085	1.69305e-194	9.52901e-194
AL157823.2	0.0790176	0.993105	3.6517	3.31624e-267	5.16584e-266
AC113143.1	0.0302732	0.431134	3.83202	4.91476e-222	3.91015e-221
AL137009.1	0.0609011	0.377244	2.63096	3.3871e-182	1.69139e-181
LINC01324	0.0654386	0.328772	2.32887	2.65117e-69	5.08496e-69
AC006019.1	0.0737834	0.0145386	-2.34341	2.14621e-60	3.84613e-60
HOTTIP	0.00396045	0.0298216	2.91262	7.43967e-82	1.58639e-81
AL627309.1	0.445648	0.00757462	-5.87859	5.35241e-283	1.68997e-281
AC074135.1	0.0861279	0.827728	3.26461	1.17698e-216	8.7233e-216
AC098850.4	0.032735	0.00264037	-3.63202	6.84804e-33	9.76251e-33
AL358972.1	0.0152831	0.0793046	2.37547	1.74323e-75	3.53414e-75
AC108134.4	0.324202	1.49249	2.20276	6.94014e-241	6.75872e-240
AL035458.2	0.0694521	0.833365	3.58486	4.6486e-263	6.58568e-262
LHX1-DT	1.05232	0.189637	-2.47226	6.87103e-16	8.36571e-16
AC104758.3	0.459268	0.0252919	-4.18259	2.21706e-213	1.56887e-212
AC067968.2	0.00998246	0.0573825	2.52314	5.3299e-112	1.45119e-111
AC004817.4	0.436494	0.102705	-2.08746	3.2682e-49	5.35647e-49
AC092490.1	0.689287	0.118411	-2.5413	4.63831e-179	2.24456e-178
AL359258.1	0.0551489	0.000611424	-6.49502	7.27075e-127	2.24927e-126
AC106791.2	0.379226	0.0578444	-2.71281	3.7406e-136	1.25298e-135
AP000350.7	0.0400692	0.0089006	-2.17052	3.88565e-78	8.03963e-78
AL023653.1	0.0201122	0.408619	4.34462	3.86637e-272	6.82284e-271
LINC00857	0.236398	0.0485811	-2.28275	2.61065e-203	1.63828e-202
AC004771.4	0.096323	0.390336	2.01876	4.74509e-151	1.79915e-150
TMEM108-AS1	0.112312	0.0202891	-2.46874	4.76515e-10	5.45551e-10
AC117394.2	0.0108507	0.13442	3.63089	7.0839e-174	3.27712e-173
LINC01254	0.0174682	0.071632	2.03587	1.05846e-112	2.90664e-112
LINC01358	0.0663903	0.413014	2.63714	3.94914e-100	9.6986e-100
AC138207.2	0.543381	2.36847	2.12392	8.5716e-284	2.86032e-282
AC005005.4	0.00101228	0.0049297	2.28389	3.61304e-259	4.77287e-258
LINC01894	0.128328	0.740477	2.52862	1.26446e-130	4.05791e-130
AC138150.1	0.0728726	0.358069	2.29679	1.88106e-210	1.27351e-209
AC006116.7	1.13531	0.167696	-2.75917	1.41017e-147	5.20389e-147
AC027088.2	0.230872	0.0141145	-4.03185	3.21103e-181	1.5877e-180
C10orf55	0.0439371	0.220596	2.32789	6.70939e-53	1.12693e-52
AL132712.1	0.00708049	0.153143	4.43489	1.64921e-191	9.00858e-191
AP000943.1	0.00156145	0.0397521	4.67007	2.86215e-153	1.10849e-152
AL354892.2	0.378479	3.18112	3.07125	3.52948e-285	1.2551e-283
AC006504.7	0.162171	1.70894	3.39751	1.66777e-285	6.14804e-284
AC148477.3	0.919216	0.104374	-3.13864	1.9401e-41	2.97674e-41
AC090774.2	0.282743	0.0195412	-3.8549	1.32868e-223	1.06795e-222
AL583722.3	0.277186	0.0163143	-4.08664	6.79827e-57	1.17869e-56
RSF1-IT1	0.0130487	0.0646294	2.30828	3.99924e-121	1.18613e-120
AC092068.3	0.0703961	0.0139238	-2.33794	1.22219e-92	2.82701e-92
AC073878.2	0.100048	0.598439	2.58052	6.90608e-195	3.89006e-194
FOXP1-AS1	0.00326347	0.0264646	3.01958	1.17736e-106	3.05446e-106
LINC02154	0.0272147	0.155092	2.51067	1.16093e-37	1.72232e-37
THSD4-AS1	0.789433	0.106032	-2.89632	1.5383e-59	2.74067e-59
ZSWIM8-AS1	1.25955	0.0585324	-4.42753	4.01295e-272	7.0638e-271
AL356108.1	0.00491564	0.0605778	3.62334	9.25174e-124	2.78979e-123
AL022396.1	0.0147304	0.0679832	2.20638	6.49412e-74	1.30234e-73
AC068025.1	0.0973223	0.502445	2.36812	1.5005e-223	1.20468e-222
AC105271.1	0.446242	0.0962691	-2.21268	7.66719e-101	1.89819e-100
LINC02559	0.176136	0.871858	2.30741	8.88494e-154	3.45629e-153
AC005050.1	0.00333079	0.0628885	4.23886	6.76533e-127	2.09383e-126
AC008149.1	0.4112	0.064213	-2.6789	1.38171e-10	1.59069e-10
LINC01352	0.0605077	0.847131	3.80739	3.97948e-262	5.53746e-261
LINC01269	0.00800273	0.0838707	3.3896	1.87682e-116	5.33281e-116
AL161938.1	0.0724735	0.0142898	-2.34247	1.17858e-115	3.32599e-115
C4A-AS1	0.799911	0.000428045	-10.8679	2.51785e-299	1.61165e-297
AL358613.1	0.0136357	0.0572329	2.06945	3.17333e-67	5.99662e-67
AC098483.1	0.0841959	0.00398077	-4.40263	1.27652e-60	2.29286e-60
GLYCTK-AS1	0.233319	1.01971	2.12777	1.45127e-154	5.67688e-154
AP003059.1	0.0743984	0.375888	2.33696	7.82636e-154	3.04618e-153
AC011379.1	0.0423121	0.00871495	-2.27951	3.00986e-39	4.53507e-39
LINC01394	0.0105099	0.142393	3.76006	1.78004e-178	8.56095e-178
AC026469.1	0.427439	0.0643957	-2.73068	9.08053e-152	3.4729e-151
LINC00466	0.00273087	0.0427918	3.9699	6.19303e-210	4.17674e-209
AC104211.1	0.337232	0.0243102	-3.7941	6.22019e-272	1.08676e-270
SPATA42	0.0692831	0.302157	2.12472	5.55763e-147	2.03385e-146
AC242842.1	0.276549	1.64664	2.57392	1.62349e-263	2.31866e-262
LINC01118	0.128417	0.0199726	-2.68475	2.44674e-83	5.28776e-83
AC046143.2	0.14753	1.17796	2.99721	1.8523e-247	1.99725e-246
AC002069.2	0.00177915	0.11105	5.96387	5.90446e-243	5.95606e-242
AP005264.2	0.00222089	0.143403	6.0128	4.00827e-167	1.77275e-166
CU633906.2	0.63021	0.00997434	-5.98147	3.90043e-259	5.13326e-258
AC068051.1	0.000871285	0.0375139	5.42814	2.16582e-116	6.14901e-116
AC098587.1	0.123075	0.962822	2.96773	1.0706e-119	3.14743e-119
AC025259.1	2.34575	0.00162667	-10.4939	2.70091e-296	1.42986e-294
LINC01602	0.0147744	0.909428	5.94379	1.88073e-135	6.26111e-135
NUTM2B-AS1	2.63254	0.646384	-2.02599	1.96424e-277	4.19097e-276
AC020658.3	0.0317191	0.00389479	-3.02573	4.1438e-62	7.53136e-62
AL672291.1	0.0103406	0.0889708	3.10501	9.03773e-142	3.17855e-141
LINC02396	0.0758004	0.00815424	-3.21658	3.85301e-29	5.30797e-29
TARID	0.282953	0.0197801	-3.83844	2.03216e-155	8.02943e-155
AC008250.1	0.00537562	0.0735418	3.77406	1.6487e-130	5.27899e-130
AL445248.1	0.0320607	0.144356	2.17075	5.32146e-150	2.00152e-149
AC113145.1	0.0206177	0.367836	4.15711	1.00284e-190	5.419e-190
AC104695.2	0.0249421	0.787781	4.98114	1.11304e-284	3.87966e-283
AC234775.2	0.0243616	1.04461	5.42221	4.62121e-285	1.63507e-283
LINC02137	1.11794	0.0760852	-3.87708	1.53713e-61	2.78082e-61
AP000997.3	0.0711835	0.00167637	-5.40813	1.78136e-181	8.85774e-181
NAV2-IT1	0.0151779	0.0821172	2.43571	1.54429e-127	4.82189e-127
AC005726.3	2.69444	0.179032	-3.9117	1.56727e-279	3.88562e-278
FP236241.1	0.353019	0.00336152	-6.71449	8.13438e-206	5.24009e-205
AL133396.1	0.000884622	0.107825	6.92941	3.98443e-183	2.00388e-182
AC015845.2	0.19354	0.862387	2.1557	2.77708e-195	1.5693e-194
AC105118.1	0.0128648	0.155489	3.59531	2.30309e-65	4.29565e-65
AC084782.1	0.18235	0.00553182	-5.04281	6.40213e-64	1.18096e-63
AC083902.1	0.00409453	0.113954	4.79861	1.51133e-145	5.45986e-145
AC084357.2	0.0184349	0.203443	3.46411	2.61779e-206	1.7035e-205
AC110285.3	0.0834911	0.375149	2.16777	4.70571e-87	1.0452e-86
PWRN1	1.01972	0.0338533	-4.91273	5.81371e-214	4.16e-213
AC020892.2	0.0262721	0.359001	3.77238	4.25132e-211	2.90617e-210
AC020905.1	0.00351518	0.194874	5.7928	1.36046e-112	3.73304e-112
UFL1-AS1	0.0177096	0.437199	4.62569	2.54761e-281	7.17508e-280
AC005670.1	0.0403992	0.568528	3.81483	2.27261e-272	4.06128e-271
LINC01433	0.030744	0.250547	3.02671	3.83229e-199	2.26369e-198
WWTR1-IT1	0.0165661	0.0921726	2.4761	7.50386e-91	1.71597e-90
AC092431.1	0.0337267	0.211579	2.64923	1.36685e-159	5.59207e-159
C4B-AS1	0.799911	0.000203653	-11.9395	7.10373e-300	5.00174e-298
AC009063.1	0.257907	0.0498345	-2.37163	9.54746e-71	1.85189e-70
AP000550.1	0.0635668	0.000916718	-6.11565	2.61451e-163	1.11097e-162
AC073655.1	0.0261348	0.17148	2.714	3.39118e-149	1.26872e-148
AC022431.1	0.016905	0.068406	2.01667	1.32238e-66	2.48754e-66
AC015712.4	0.70656	0.127789	-2.46705	3.30462e-142	1.16514e-141
AC104051.2	0.191648	1.51454	2.98235	3.433e-64	6.3543e-64
AC145124.1	1.67119	0.378971	-2.14071	5.66788e-263	7.96557e-262
CU638689.1	0.147115	0.000534782	-8.10377	4.12755e-160	1.69755e-159
LINC02150	0.0633131	0.0154453	-2.03534	3.98254e-39	5.9904e-39
BANCR	0.0153338	0.128178	3.06336	1.61132e-147	5.93685e-147
LINC01197	0.894529	0.220762	-2.01864	5.79817e-175	2.70543e-174
SLC8A1-AS1	0.285687	0.0294531	-3.27794	5.2913e-63	9.67438e-63
CHRM3-AS2	0.082034	0.0137496	-2.57684	5.94741e-40	9.01329e-40
LINC02217	1.4832	0.361153	-2.03803	2.45513e-48	4.00244e-48
AC073052.1	0.179914	0.0411975	-2.12668	8.73171e-82	1.86077e-81
AC009118.1	0.0247205	0.574033	4.53736	7.42125e-218	5.60473e-217
AL139231.1	7.00096e-05	0.551505	12.9435	7.30334e-164	3.12411e-163
AC012186.2	0.0842132	0.47722	2.50254	1.98688e-206	1.29654e-205
ARAP1-AS1	1.38459	0.0383335	-5.17471	4.37216e-115	1.22794e-114
AC005358.1	0.000924219	0.0082641	3.16055	1.19642e-150	4.52175e-150
AP003119.3	0.107778	0.605871	2.49095	1.62011e-228	1.37768e-227
LINC01829	0.206368	0.0193525	-3.41462	3.33141e-117	9.55067e-117
AC016716.1	0.0319447	0.525987	4.04138	4.64598e-231	4.02861e-230
AC118755.2	0.00546508	0.28377	5.69833	1.65786e-176	7.82372e-176
AC016405.1	0.0238733	0.152409	2.67448	1.69018e-179	8.20164e-179
AL354919.2	0.0449484	1.29046	4.84347	7.2998e-206	4.70676e-205
AC007277.1	0.0498994	0.310189	2.63605	1.33411e-211	9.20029e-211
PKP4-AS1	1.06956	0.108754	-3.29787	9.83571e-267	1.52205e-265
AL353608.3	0.395216	0.00641731	-5.94453	3.76539e-114	1.04998e-113
AC090630.1	0.0259219	0.136237	2.39388	3.59739e-108	9.48659e-108
LINC02266	0.0488455	0.329318	2.75318	1.22229e-178	5.89463e-178
AL662884.1	0.0246556	0.227242	3.20425	8.05433e-242	7.96497e-241
AL121821.2	0.000247673	0.636536	11.3276	8.08337e-285	2.84575e-283
ENOX1-AS1	0.0594871	0.00609791	-3.28619	2.50183e-132	8.14771e-132
AP000757.2	0.0215789	0.124003	2.52268	4.66505e-97	1.11533e-96
AL357673.2	0.0465286	0.00631184	-2.88198	2.51854e-101	6.25725e-101
AC092902.2	0.02692	0.185181	2.78219	5.42629e-162	2.27826e-161
LINC00893	2.25813	0.314271	-2.84505	8.03432e-279	1.81896e-277
AC023906.4	0.327063	0.0801331	-2.0291	5.72865e-75	1.15707e-74
AC078929.1	0.00721345	0.0389825	2.43407	3.96646e-83	8.56419e-83
FMR1-IT1	0.121823	0.659214	2.43596	1.92003e-215	1.3937e-214
AC009271.1	0.0600265	0.483311	3.00928	1.04093e-204	6.61477e-204
AC010325.2	0.00394248	0.12399	4.97498	8.51048e-147	3.11123e-146
MIR3150BHG	0.0580282	0.00564976	-3.36049	4.1857e-71	8.15031e-71
AC034102.3	0.0130116	0.29019	4.47913	4.46621e-249	4.99946e-248
U52111.1	0.135121	0.873693	2.69287	3.49919e-256	4.3996e-255
TPRG1-AS1	0.0991733	0.47555	2.26157	2.12593e-157	8.53889e-157
MIR646HG	0.210037	0.0521948	-2.00866	1.04439e-89	2.37518e-89
AC022126.1	0.00765637	0.0471601	2.62283	1.92818e-105	4.96211e-105
BACH1-AS1	0.0160172	0.142156	3.14978	1.21494e-226	1.00522e-225
AC005089.1	0.305763	0.0189842	-4.00954	2.10815e-202	1.30665e-201
AL353768.1	0.296538	0.0630667	-2.23327	2.76916e-61	5.00068e-61
AC023158.1	0.129029	0.0310493	-2.05506	6.04617e-53	1.01577e-52
AP000439.3	0.340681	0.000411038	-9.69494	4.52491e-281	1.24453e-279
AL157931.1	0.000370689	0.537322	10.5014	0	0
AP001059.1	0.123272	0.000913689	-7.07593	1.17799e-114	3.29397e-114
FGF13-AS1	0.0913423	0.376059	2.0416	6.31228e-78	1.30413e-77
AP000873.2	1.77928	0.0829014	-4.42375	5.76738e-281	1.57396e-279
AC011444.3	0.290821	1.26034	2.11561	2.67319e-224	2.16344e-223
AL122008.3	0.150138	0.00933102	-4.00811	4.07082e-121	1.20634e-120
AC011444.1	0.0630518	0.735676	3.54446	4.00497e-288	1.57536e-286
LINC02290	0.00130122	0.0145154	3.47965	2.83512e-113	7.81908e-113
AC007314.1	0.00297303	0.0420782	3.82307	5.09787e-118	1.47167e-117
AL353753.1	0.00549607	0.0400887	2.86672	8.0289e-104	2.03351e-103
PDZRN3-AS1	0.0664118	0.00934592	-2.82903	1.26107e-16	1.54689e-16
AC004870.2	0.00592695	0.0619353	3.3854	2.35323e-148	8.74359e-148
LINC01385	0.00586984	0.125138	4.41405	1.76022e-106	4.55819e-106
TMEM92-AS1	0.0596171	0.255289	2.09833	1.77084e-100	4.36448e-100
SAMMSON	0.0842494	0.00696626	-3.59621	3.64968e-26	4.89287e-26
AC074011.1	0.0125996	0.266385	4.40206	7.11329e-240	6.81424e-239
AC005999.1	0.0426133	0.543477	3.67284	3.75061e-191	2.03923e-190
ARPP21-AS1	0.104822	0.475256	2.18077	1.3393e-101	3.33217e-101
LINC02587	0.145831	1.21081	3.0536	1.45791e-20	1.8603e-20
AP001267.1	3.30335	0.0170305	-7.59967	3.1607e-281	8.86632e-280
AC083906.3	0.00378138	0.206098	5.76827	5.36609e-247	5.75955e-246
AL845552.2	0.612002	0.151442	-2.01477	8.80666e-115	2.46649e-114
AC112693.1	0.0243402	0.198744	3.0295	9.68002e-186	4.98224e-185
AC025188.1	0.00203164	0.042039	4.37102	3.47757e-109	9.23984e-109
AL022323.1	0.575847	0.00264106	-7.76842	2.09964e-202	1.30367e-201
AC025809.1	0.044504	0.265632	2.57742	2.37365e-192	1.31494e-191
AC009320.1	0.0029072	0.143218	5.62243	6.29125e-186	3.24518e-185
AL118508.1	0.349103	0.0360417	-3.27591	7.33991e-92	1.68945e-91
PAQR9-AS1	1.46907	0.151509	-3.27743	1.31051e-246	1.40233e-245
AL589765.1	0.111869	0.645014	2.52752	2.83705e-164	1.21951e-163
FP671120.4	9.22827	0.295258	-4.96601	0	0
AC010320.3	0.0395919	0.551199	3.7993	1.19198e-277	2.55876e-276
AC141586.2	0.0399036	0.328243	3.04017	2.35013e-223	1.88251e-222
LINC01879	0.0343194	0.00506841	-2.75942	5.97853e-23	7.77949e-23
LINC02062	0.212124	1.49948	2.82148	5.00613e-284	1.68652e-282
AP001042.1	0.00243706	0.0141605	2.53866	0	0
AC007785.3	1.04881	0.1922	-2.44807	2.90125e-200	1.73853e-199
AP003119.2	0.24069	1.10698	2.20137	1.4573e-216	1.07896e-215
AC078880.3	0.0446804	0.336696	2.91373	7.24975e-84	1.57208e-83
AC093915.1	0.0820333	0.357577	2.12397	9.9538e-92	2.28811e-91
AL353732.1	0.360914	0.0337985	-3.41662	9.65337e-236	8.85018e-235
AC005736.1	0.131634	0.0226705	-2.53764	2.38908e-181	1.18628e-180
AC008667.1	0.0667681	0.47943	2.84409	1.69055e-238	1.59346e-237
ATXN8OS	0.267524	0.0122557	-4.44814	3.53898e-204	2.24082e-203
Z99289.2	0.0467168	0.00639637	-2.86862	5.43406e-74	1.09099e-73
Z94721.1	0.03908	0.219896	2.49232	2.38825e-145	8.60577e-145
AC009299.2	0.674598	0.0154576	-5.44764	1.52188e-244	1.57814e-243
AC105219.3	0.00048894	0.0930025	7.57147	6.14904e-246	6.54009e-245
AL359979.2	0.0180754	0.100756	2.47877	3.67651e-103	9.25504e-103
AC005695.3	0.0553144	0.244607	2.14474	2.93693e-151	1.11718e-150
AC004888.1	0.0540943	0.525797	3.28096	2.47841e-209	1.65407e-208
ITPRIP-AS1	0.264195	0.0552257	-2.25819	6.00382e-37	8.86039e-37
AC009166.1	0.038705	0.469294	3.5999	1.99807e-255	2.47248e-254
AC233263.6	0.311172	0.0148127	-4.39281	3.85921e-272	6.82284e-271
AC051619.5	0.921735	0.0668014	-3.7864	2.89191e-257	3.68876e-256
AL606748.1	0.0267359	0.360971	3.75503	3.39401e-227	2.83479e-226
AC005224.1	0.460129	0.0052107	-6.46442	1.18453e-284	4.10851e-283
AL592435.1	1.03546	0.0518885	-4.31872	2.49913e-280	6.66529e-279
MYCNUT	0.00981072	0.048694	2.31131	5.39656e-82	1.15353e-81
AC007952.8	0.0756247	0.00207453	-5.188	3.01932e-129	9.58046e-129
LINC02151	0.0275306	0.347581	3.65824	1.45253e-126	4.4876e-126
AL583785.1	0.175484	0.733708	2.06386	3.91092e-111	1.05586e-110
LINC02470	0.40186	0.0924038	-2.12067	4.43959e-141	1.54748e-140
LINC02617	0.0115532	0.253881	4.45778	6.41472e-198	3.75133e-197
AC073517.1	0.0553305	0.286516	2.37247	9.51095e-193	5.28128e-192
AL162171.2	0.79154	0.1811	-2.12788	5.77788e-236	5.31097e-235
LINC02251	0.115469	0.664286	2.5243	2.01907e-164	8.68967e-164
AP000892.1	0.0234225	0.156048	2.73602	1.66315e-165	7.25993e-165
AL135818.1	0.611567	0.124213	-2.29969	5.96682e-201	3.62801e-200
AC009123.1	0.051923	0.0118982	-2.12563	3.5994e-10	4.12691e-10
LINC02572	0.032574	0.364823	3.4854	1.33476e-257	1.71811e-256
LINC01250	0.200419	0.0345619	-2.53576	1.79381e-64	3.32813e-64
UBE2Q1-AS1	0.0735342	0.379388	2.36719	7.20639e-181	3.54331e-180
AC011840.2	0.104513	0.0232906	-2.16587	1.08322e-109	2.8901e-109
CCDC26	0.0324434	0.311323	3.26241	2.99096e-196	1.71075e-195
AC005832.1	0.0246459	0.121668	2.30353	7.667e-129	2.42404e-128
AC020659.2	0.21062	0.0160903	-3.71038	3.0963e-52	5.16857e-52
LARS2-AS1	0.00933726	0.143252	3.93941	8.04846e-159	3.27947e-158
AC125618.1	0.0902444	0.406828	2.17251	8.67781e-157	3.46768e-156
AC090409.2	0.0336876	0.15053	2.15976	7.92026e-155	3.10851e-154
RASGRF2-AS1	1.05177	0.209634	-2.32688	3.12227e-133	1.02203e-132
AC234781.1	0.217933	0.0241333	-3.17479	1.50946e-118	4.38453e-118
AL035658.1	0.0164002	0.0656886	2.00193	8.07897e-73	1.60417e-72
CCDC148-AS1	0.0014002	0.0219251	3.96888	1.30642e-109	3.48428e-109
AC020916.1	1.37708	0.150222	-3.19645	1.33538e-265	2.03516e-264
EML2-AS1	0.106966	0.00579452	-4.20632	2.74216e-63	5.0267e-63
AC093583.1	0.036725	0.00531771	-2.78789	1.21349e-26	1.63619e-26
AC092171.1	0.158426	0.657244	2.05262	2.02866e-205	1.30326e-204
LINC02541	0.0369656	0.245271	2.73012	6.8873e-186	3.55003e-185
AC004775.1	0.250206	0.0332576	-2.91136	9.81538e-138	3.3258e-137
AC097382.2	0.104323	0.0149459	-2.80324	4.89756e-130	1.55964e-129
AC016396.2	0.0451269	0.00582537	-2.95356	1.63757e-46	2.62885e-46
AL133492.1	0.0558606	0.00600643	-3.21725	7.00339e-51	1.15889e-50
AC114781.2	0.00268597	0.113513	5.40127	6.82594e-197	3.94593e-196
AL645608.2	0.126491	0.760155	2.58726	3.2164e-120	9.48752e-120
LINC02245	0.0524106	0.00342119	-3.93729	6.07016e-140	2.09613e-139
AC079610.1	0.122982	1.4231	3.53251	3.14063e-284	1.07345e-282
LINC01103	0.032407	0.136746	2.07712	6.4606e-117	1.8439e-116
NAMA	0.634905	0.12916	-2.29738	3.72172e-253	4.40415e-252
AF111169.2	0.00323404	0.0424883	3.71566	2.27002e-92	5.24555e-92
C21orf91-OT1	0.00871235	0.0796916	3.19329	4.78499e-130	1.52448e-129
AC239802.2	0.373481	0.0648343	-2.52621	2.76573e-132	9.00302e-132
LINC02488	0.031995	0.711759	4.47547	8.68708e-146	3.148e-145
AC133919.2	0.0360371	0.478279	3.7303	9.72324e-141	3.37914e-140
AC040174.2	0.520129	0.0396531	-3.71336	3.26911e-163	1.38745e-162
AC091230.1	0.818325	0.00747405	-6.77464	5.40203e-244	5.53649e-243
AC007344.1	0.0128167	0.515015	5.32852	5.26628e-230	4.53854e-229
AC129492.2	0.305989	0.0128837	-4.56986	3.77709e-240	3.6381e-239
AC007493.2	0.0168419	0.108722	2.69051	2.80293e-146	1.02097e-145
AJ239322.1	0.24062	0.0342827	-2.8112	3.27898e-51	5.43871e-51
LINC02413	0.0052984	0.0425838	3.00668	3.34828e-127	1.04131e-126
LINC01764	0.00524414	0.0410521	2.96868	1.23575e-115	3.48594e-115
AP001021.2	0.0185124	0.325013	4.13394	4.73822e-184	2.39496e-183
AP003059.2	0.0173409	0.39959	4.52627	1.21462e-275	2.42271e-274
AC024941.2	0.171024	0.751834	2.13622	2.68624e-192	1.48577e-191
AC010768.1	0.00602815	0.0421034	2.80415	3.97969e-94	9.3124e-94
AC007952.5	0.153259	0.000969187	-7.30498	1.81296e-253	2.15262e-252
WNT5A-AS1	0.0675671	1.00953	3.90122	1.26619e-267	2.00342e-266
AC091212.1	0.00695605	0.223809	5.00786	1.22747e-250	1.40531e-249
AL136368.1	0.0961084	0.841749	3.13066	4.83842e-263	6.84083e-262
AP000759.1	0.353282	1.88582	2.4163	1.64934e-279	4.06049e-278
LSAMP-AS1	0.0229564	0.155876	2.76343	1.71579e-94	4.02964e-94
AC093249.2	0.0742807	0.45631	2.61895	1.32236e-234	1.19215e-233
AC007402.1	0.0185985	0.154347	3.05292	1.75048e-103	4.41602e-103
AC006449.2	0.162163	0.844299	2.38031	5.64003e-254	6.75365e-253
F11-AS1	0.267815	0.06123	-2.12892	5.30527e-100	1.30019e-99
AC008691.1	0.0948032	0.0234941	-2.01264	2.58407e-24	3.40784e-24
AL139286.1	0.00606961	1.71108	8.13909	0	0
AL109741.1	0.414606	2.00268	2.27212	2.41055e-244	2.48501e-243
AC008280.2	0.128844	1.08585	3.07513	6.51126e-273	1.1939e-271
AC092683.2	0.545934	0.00652223	-6.38722	6.75297e-191	3.6547e-190
AP003110.1	0.0131593	0.0600895	2.19103	5.40343e-58	9.457e-58
MIR205HG	0.103872	0.00826939	-3.65089	1.94454e-71	3.8032e-71
HPYR1	0.125416	0.0273447	-2.19739	9.53673e-49	1.55977e-48
AL133325.2	0.0169604	0.130988	2.94919	9.98305e-125	3.03763e-124
AC063944.1	0.655464	0.139008	-2.23735	3.22547e-220	2.5178e-219
VIPR1-AS1	0.636976	0.0279647	-4.50956	5.64205e-189	2.98241e-188
AC006305.1	0.0589652	0.391136	2.72974	3.1188e-206	2.02765e-205
AL355974.1	0.129394	0.803271	2.63411	8.58542e-140	2.96178e-139
AC073115.2	0.0030245	0.0771029	4.67202	3.10702e-114	8.67429e-114
AC005544.1	0.0757273	0.552454	2.86697	6.63505e-155	2.60845e-154
AC000058.1	0.0118975	0.0672646	2.49919	2.38502e-65	4.44728e-65
