# Supplementary material for: Identification and validation of ferroptosis-related lncRNA signatures as a novel prognostic model for glioma
Source: Front Genet. 2022 Sep 20;13:927142. doi: 10.3389/fgene.2022.927142 (PMC9549413; doi:10.3389/fgene.2022.927142)
Supplement: Supplementary file 3 [file Table4.XLSX]

## Sheet: Sheet1
Linc01426	sh1	AAAAGGTGCTGAACTTTGAAAATT TGGATCCAAATTTTCAAAGTT CAGCACC
Linc01426	sh2	AAAAGGAGACGCTGTTTCACCATT TGGATCCAAATGGTGAAACAG CGTCTCC
Linc01426	F: CGCACCCAGATACTTTTCGT
	R: GCCGTTGAGGTTGTCGTAAT
AL133415.1	F:TCCACTTCACAGGTGAGGGAC
	R:CTTCCCAACAGTTTGCTGACC
AC009227.1	F:GGAGCTCCGTAAGCTGAACG
	R:TTAAGCGGTTGGCAGAAGAGG
