# Supplementary material for: Identification and validation of ferroptosis-related lncRNA signatures as a novel prognostic model for glioma
Source: Front Genet. 2022 Sep 20;13:927142. doi: 10.3389/fgene.2022.927142 (PMC9549413; doi:10.3389/fgene.2022.927142)
Supplement: Supplementary file 4 [file Table1.XLSX]

## Sheet: Sheet1
Symbol
RPL8
IREB2
ATP5MC3
CS
EMC2
ACSF2
G6PD
PGD
VDAC2
TP53
CARS1
TP53
KEAP1
HMOX1
TP53
ATG5
ATG7
NCOA4
TF
ALOX5
ALOX12
ALOX12B
ALOX15
ALOX15B
ALOXE3
PHKG2
NCOA4
ACSL4
TP53
SAT1
ALOX15
ACSL4
EGFR
NOX4
MAPK3
MAPK1
ACSL4
ZEB1
KEAP1
DPP4
ALOX15
ALOX12
CDKN2A
PEBP1
SOCS1
CDO1
MYB
HMOX1
SLC1A5
CHAC1
LINC00472
NOX4
GOT1
BECN1
PRKAA2
PRKAA1
ELAVL1
BAP1
ABCC1
ACSL4
MIR6852
ACVR1B
TGFBR1
BAP1
ALOX12
ACSL4
HMOX1
IFNG
ANO6
HMGB1
TNFAIP3
ATF3
ATM
YY1AP1
EGLN2
MIOX
TAZ
MTDH
IDH1
TAZ
BECN1
PANX1
ACSL4
LONP1
PTGS2
CHAC1
FTH1
SLC7A11
GPX4
AKR1C1
AKR1C2
AKR1C3
GPX4
RB1
HSPB1
HSF1
SLC7A11
SLC7A11
NFE2L2
SQSTM1
NQO1
HMOX1
FTH1
MUC1
MT1G
SLC40A1
SLC7A11
GPX4
SLC7A11
CISD1
SLC7A11
GPX4
HSPA5
ATF4
GPX4
ATF4
NFE2L2
TP53
SLC7A11
HELLS
SCD
FADS2
SRC
STAT3
NFE2L2
PML
NFS1
TP63
SLC7A11
TP53
CDKN1A
MIR137
VDAC2
FH
CISD2
SLC40A1
MIR9-1
MIR9-2
MIR9-3
CBS
NFE2L2
SQSTM1
GPX4
ISCU
FTH1
ACSL3
OTUB1
CD44
LINC00336
STAT3
BRD4
PRDX6
MIR17
SCD
SESN2
NF2
ARNTL
HIF1A
CA9
HSPA5
TMBIM4
AIFM2
AIFM2
LAMP2
ZFP36
GPX4
PROM2
CHMP5
CHMP6
AKR1C1
AKR1C2
AKR1C3
CBS
NFE2L2
CAV1
GCH1
